# Supplementary material for: Imine induced metal-free C–H arylation of indoles
Source: Royal Society of Chemistry journal article supplement (doi:10.1039/d3qo01002c), 2023-01-01

## Supporting Information

### Imine Induced Metal-Free C–H Arylation of Indoles

Lin Zhang,<sup>a</sup> Jianan Gao,<sup>a</sup> Bin Wang,<sup>a</sup> Azhar Iqbal,<sup>c</sup> Weiwei Jin,<sup>a</sup> Yu Xia,<sup>a</sup> Yonghong Zhang<sup>a,b\*</sup> and Chenjiang Liu,<sup>a,b\*</sup>

<sup>a</sup> Prof. Dr. Y. Zhang,\* Dr. L. Zhang, Mr. Y. Liu, J. Gao, Prof. Dr. W. Jin, Y. Xia, C. Liu\* State Key Laboratory of Chemistry and Utilization of Carbon Based Energy Resources; College of Chemistry, Xinjiang University, Urumqi, 830017, Xinjiang, PR China. E-mail: zhzhzyh@126.com; pxylcj@126.com.

<sup>b</sup> Prof. Dr. C. Liu\* College of Future Technology, Xinjiang University, Urumqi 830017, P. R. China.

<sup>c</sup> Department of Chemistry, Bacha Khan University, Charsadda, Pakistan.

## ***Table of Contents***

|                                                                               |     |
|-------------------------------------------------------------------------------|-----|
| Supporting Information.....                                                   | 1   |
| 1. General Information.....                                                   | 1   |
| 2. Synthesis of Indoles.....                                                  | 1   |
| 3. Synthesis of Aryltriazenes.....                                            | 1   |
| 4. Experimental Procedures.....                                               | 2   |
| 5. NMR Spectra.....                                                           | 7   |
| 6. References.....                                                            | 1 2 |
| 7. Copies of <sup>1</sup> H NMR and <sup>13</sup> C NMR for the Products..... | 1 3 |

## 1. General Information

Unless otherwise noted, all reagents and solvents were purchased from commercial sources (Adamas-beta, Alfa Aesar) and used without further purification. Reactions were monitored using Thin Layer Chromatography (TLC) carried out on Merck silica gel plates (60F<sub>254</sub>) using UV light as the visualizing agent. Column chromatography was performed using silica gel 60 (300-400 mesh). HRMS data were recorded on Thermo Fisher Scientific Q-Exactive. All <sup>1</sup>H NMR, <sup>13</sup>C NMR, <sup>19</sup>F NMR spectra were recorded on 600 MHz NMR spectrometers (Bruker AVANCE NEO 600) or 400 MHz NMR spectrometers (Varian Inova-400). Chemical shifts were given in parts per million (ppm,  $\delta$ ), referenced to the solvent peak of CDCl<sub>3</sub> or DMSO-*d*<sub>6</sub>, defined at  $\delta = 7.26$  or 2.50 (<sup>1</sup>H NMR), defined at  $\delta = 77.0$  or 39.70 (<sup>13</sup>C NMR). Coupling constants were quoted in Hz (*J*). <sup>1</sup>H NMR Spectroscopy splitting patterns were designated as singlet (s), doublet (d), triplet (t), quartet (q). Splitting patterns that could not be interpreted or easily visualized were designated as multiplet (m). EPR spectra were recorded on a Bruker EMX plus spectrometer. MS data were recorded on Agilent 6125C. Melting point (M.P.) was recorded on BÜCHI (M-560). IR spectra were recorded on a Mettler Toledo React IR I5.

## 2. Synthesis of Indoles<sup>[1]</sup>

### 2.1 Synthesis of 1-methylindole-3-carbaldehyde derivative

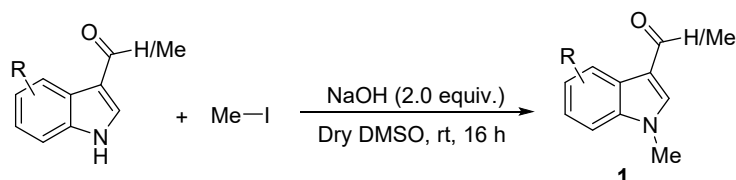

A mixture of 1*H*-indole-3-carbaldehyde derivative or 1-(1*H*-indol-3-yl)ethan-1-one (2 mmol, 1.0 equiv.), NaOH (4 mmol, 2.0 equiv.) and dry DMSO (5 mL, 0.4 M) was added to a dried round bottom flask. Then, MeI (4 mmol, 2.0 equiv.) was added dropwise to the reaction mixture and the resulting mixture was stirred at room temperature for 16 h. When the reaction completed, 5 mL of water was added to the mixture, the aqueous mixture was extracted with ethyl acetate (3×5 mL). The combined organic phase was dried over anhydrous MgSO<sub>4</sub>, filtered and concentrated under reduced pressure, the residue was purified by flash column chromatography (petroleum ether / ethyl acetate 30:1-10:1) to afford the desired product.

### 2.2 Synthesis of (*E*)-*N*-(4-methoxyphenyl)-1-(1-methyl-1*H*-indol-3-yl)methanimine

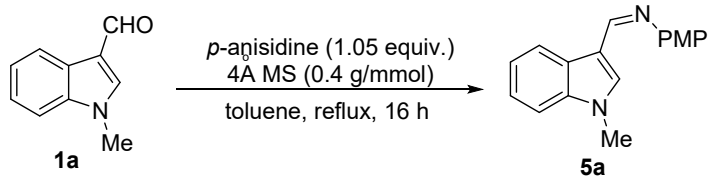

In a dried round bottom flask under nitrogen, were added 1-methylindole-3-carbaldehyde (2.0 mmol, 159.2 mg), *p*-anisidine (2.1 mmol, 1.05 equiv.) and 4Å molecular sieves (0.4 g/mmol) and dry toluene (5 mL) was added and the reaction mixture was refluxed for 16 h. After completion of the reaction, the reaction mixture was cooled to room temperature, filtered through a pad of Celite (eluted with ethyl acetate) and concentrated in vacuo to give the crude product. The purified product 5a was obtained from petroleum ether.

## 3. Synthesis of Aryltriazenes<sup>[2]</sup>

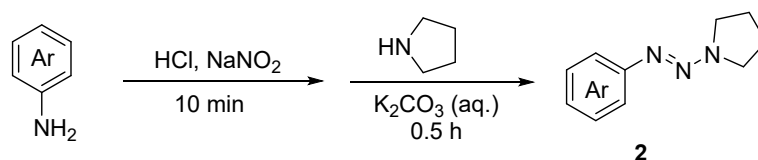

A solution of arylamine (20 mmol) in concentrated HCl (4 mL) was cooled in an ice bath while a solution of NaNO<sub>2</sub> (20 mmol) in water (10 mL) was added dropwise. The resulting solution of the diazonium salt was stirred in an ice bath for 10 min and then added all at once to a chilled solution of amine (22 mmol) and 1.2 M K<sub>2</sub>CO<sub>3</sub> aqueous (20 mL) to the above solution, and the resulting mixture was stirred for 0.5 h. The resulting precipitate was recrystallized in EtOH or separated by column chromatography to obtain the desired purified aryltriazenes products.

## 4. Experimental Procedures

### 4.1 General procedure for the synthesis of products (taking **3a** as an example)

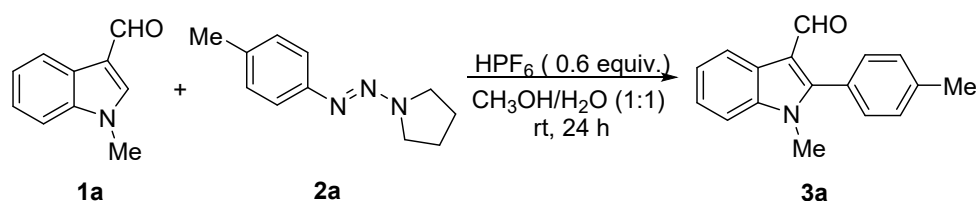

A mixture of 1-methylindole-3-carbaldehyde **1a** (0.1 mmol, 15.9 mg), *p*-methylphenyltriazenes **2a** (0.3 mmol, 56.7 mg), CH<sub>3</sub>OH (0.5 mL) and H<sub>2</sub>O (0.5 mL) was added to a dried tube. Then, a solution of HPF<sub>6</sub> (0.06 mmol, 8.8 μL) in CH<sub>3</sub>OH (0.5 mL) and H<sub>2</sub>O (0.5 mL) was added dropwise to the above stirred solution in 30 minutes. The reaction mixture was stirred at ambient temperature for 24 h. When the reaction was finished, 5 mL of water was added to the mixture and the aqueous mixture was extracted with ethyl acetate (3×5 mL). The combined organic phase was dried over anhydrous MgSO<sub>4</sub>, filtered and concentrated under reduced pressure, the residue was purified by flash column chromatography (eluent: petroleum ether/EtOAc = 30:1 to 10:1, v/v) to afford the desired product **3a** as a yellow semisolid (19.6 mg, 79% yield).

### 4.2 Gram-scale reaction

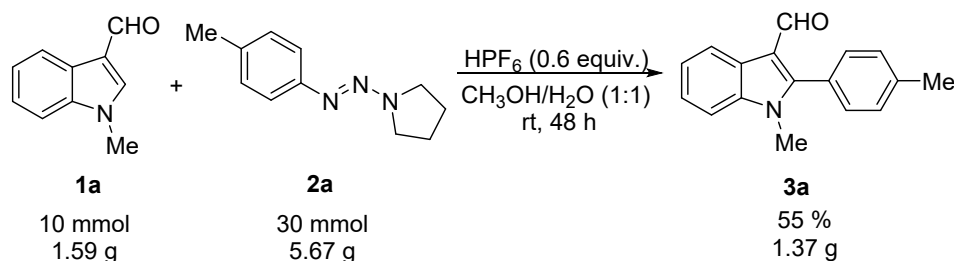

A mixture of 1-methylindole-3-carbaldehyde **1a** (10.0 mmol, 1.59 g), *p*-methylphenyltriazenes **2a** (30.0 mmol, 5.67 g), CH<sub>3</sub>OH (50.0 mL) and H<sub>2</sub>O (50.0 mL) was added to a dried round bottom flask. Then, a solution of HPF<sub>6</sub> (6 mmol, 0.88 mL) in CH<sub>3</sub>OH (50.0 mL) and H<sub>2</sub>O (50.0 mL) was added dropwise to the above stirred solution over 30 minutes. The reaction mixture was stirred at ambient temperature for 48 h. When the reaction was finished, 50 mL of water was added to the mixture and the aqueous mixture was extracted with ethyl acetate (3×50 mL). The combined organic phase was dried over anhydrous MgSO<sub>4</sub>, filtered and concentrated under reduced pressure, the residue was purified by silica gel column chromatography (eluent: petroleum ether/EtOAc = 30:1 to 10:1, v/v) to afford the desired product **3a** as a yellow semisolid (1.37 g, 55% yield).

### 4.3 Control experiments

#### 4.3.1 Synthesis of 2-(4-tolyl)-1-methylindole-3-carbaldehyde by aryldiazonium salt

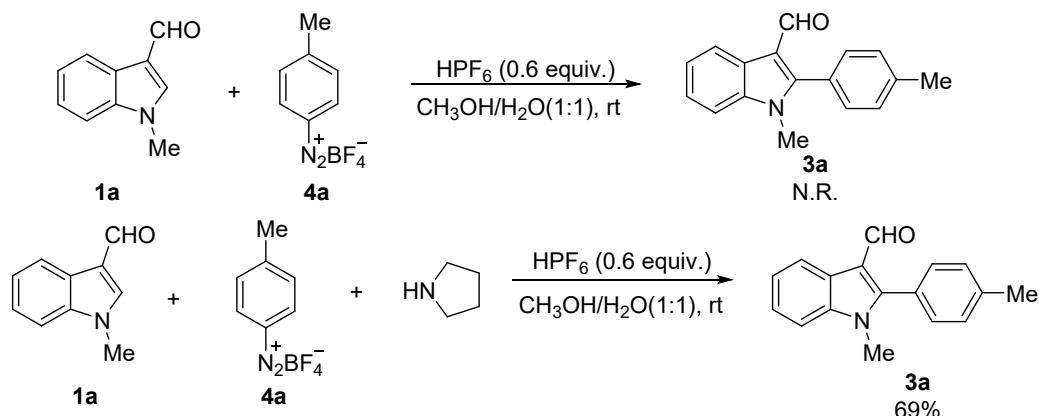

A mixture of 1-methylindole-3-carbaldehyde **1a** (0.1 mmol, 15.9 mg), *p*-methylbenzediazonium tetrafluoroborate **4a** (0.3 mmol, 61.8 mg), CH<sub>3</sub>OH (0.5 mL) and H<sub>2</sub>O (0.5 mL) was added and stirred at ambient temperature. Then, a solution of HPF<sub>6</sub> (60 wt.% solution in water, 0.06 mmol, 8.8 μL) in CH<sub>3</sub>OH (0.5 mL) and H<sub>2</sub>O (0.5 mL) was added dropwise to the above stirred solution in 30 minutes. The reaction mixture was stirred at ambient temperature for 24 h. When the reaction was finished, product **3a** was not detected by TLC. However, tetrahydropyrrole (0.3 mmol, 25 μL) was added to the above system, obtained the corresponding product **3a**. When the reaction was finished, 5 mL of water was added to the mixture, the aqueous mixture was extracted with ethyl acetate (3×5 mL). The combined organic phase was dried over anhydrous MgSO<sub>4</sub>, filtered and concentrated under reduced pressure, the residue was purified by flash column chromatography (eluent: petroleum ether/EtOAc = 30:1 to 10:1, v/v) to afford the desired product **3a** as yellow semisolid (17.2 mg, 69% yield).

#### 4.3.2 Imine-directed arylation of indole C-2

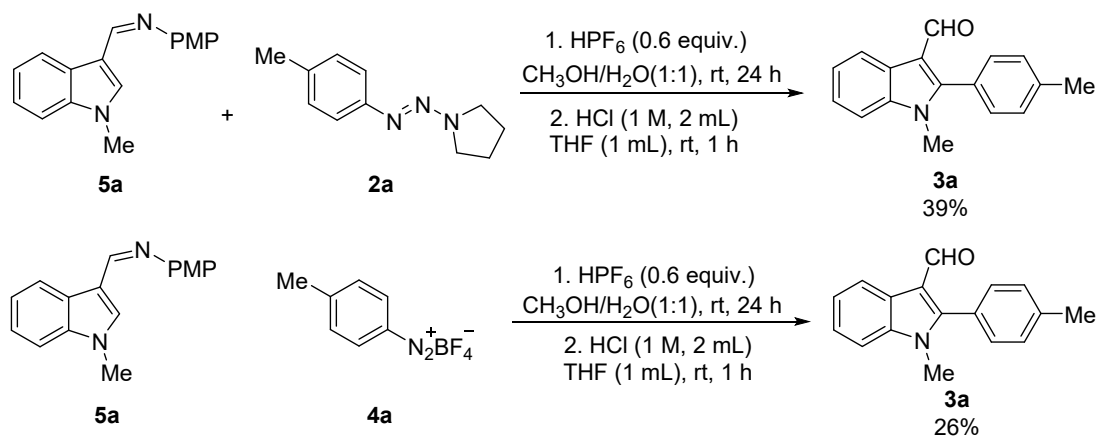

A mixture of (*E*)-*N*-(4-methoxyphenyl)-1-(1-methyl-1*H*-indol-3-yl)methanimine **5a** (0.1 mmol, 26.4 mg), *p*-methylphenyltriazenes **2a** (0.3 mmol, 56.7 mg), CH<sub>3</sub>OH (0.5 mL) and H<sub>2</sub>O (0.5 mL) was added and stirred at ambient temperature. Then, a solution of HPF<sub>6</sub> (60 wt.% solution in water, 0.06 mmol, 8.8 μL) in CH<sub>3</sub>OH (0.5 mL) and H<sub>2</sub>O (0.5 mL) was added dropwise to the above stirred solution in 30 minutes. The reaction mixture was stirred at ambient temperature for 24 h. When the reaction was finished, the reaction mixture was quenched by addition of HCl (1M, 2 mL) and THF (1 mL), stirred at room temperature for 1 h. When the reaction was finished, 5 mL of water was added to the mixture, the aqueous mixture was extracted with ethyl acetate (3×5 mL). The combined organic phase was dried over anhydrous MgSO<sub>4</sub>, filtered and concentrated under reduced pressure, the residue was purified by flash column chromatography (eluent: petroleum ether/EtOAc = 30:1 to 10:1, v/v) to afford the desired product **3a** as yellow semisolid (9.7 mg, 39% yield). Similarly, (*E*)-*N*-(4-methoxyphenyl)-1-(1-

methyl-1*H*-indol-3-yl)methanimine **5a** (0.1 mmol, 26.4 mg), and *p*-methylbenzendiazonium tetrafluoroborate **4a** (0.3 mmol, 56.7 mg), the corresponding product **3a** (6.5 mg, 26% yield) was also obtained after the above operation.

#### 4.3.3 Labeling experiment with H<sub>2</sub><sup>18</sup>O

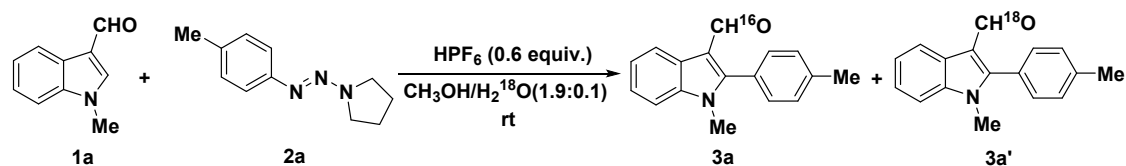

A mixture of 1-methylindole-3-carbaldehyde **1a** (0.1 mmol, 15.9 mg), *p*-methylphenyltriazenes **2a** (0.3 mmol, 56.7 mg), dry CH<sub>3</sub>OH (0.9 mL) and H<sub>2</sub><sup>18</sup>O (0.1 mL) was added and stirred at ambient temperature. Then, a solution of HPF<sub>6</sub> (60 wt.% solution in water, 0.06 mmol, 8.8 μL) in dry CH<sub>3</sub>OH (1.0 mL) was added dropwise to the above solution in 30 minutes. The reaction mixture was stirred at ambient temperature for 24 h. When the reaction was finished, a mixture of **3a** and **3a'** was obtained from the mass spectrum of the mixed sample, **3a**: MS (ESI) *m/z* found 250.10; **3a'**: MS (ESI) *m/z* found 252.10 with a ratio close to 3:2.

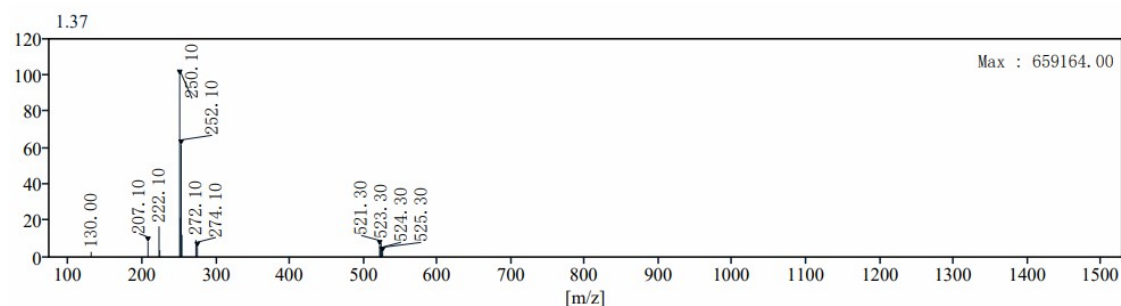

**Figure S1** Mass spectrometry data of <sup>18</sup>O labeling experiment

#### 4.3.4 Free radical capture experiment

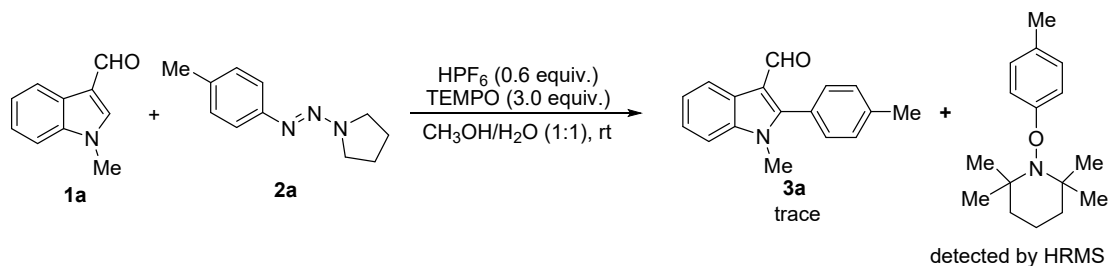

A mixture of 1-methylindole-3-carbaldehyde **1a** (0.1 mmol, 15.9 mg), *p*-methylphenyltriazenes **2a** (0.3 mmol, 56.7 mg), 2,2,6,6-tetramethyl-1-piperidinyloxy (0.3 mmol, 46.9 mg), CH<sub>3</sub>OH (0.5 mL) and H<sub>2</sub>O (0.5 mL) was added and stirred at ambient temperature. Then, a solution of HPF<sub>6</sub> (60 wt.% solution in water, 0.06 mmol, 8.8 μL) in CH<sub>3</sub>OH (0.5 mL) and H<sub>2</sub>O (0.5 mL) was added dropwise to the above solution in 30 minutes. The reaction mixture was stirred at ambient temperature for 24 h. When the reaction was finished, TLC showed that only trace **3a** was formed and the aryl radical-TEMPO adduct was detected by HRMS. HRMS (ESI<sup>+</sup>): *m/z* calcd. for C<sub>23</sub>H<sub>24</sub>N<sub>3</sub> [M+H]<sup>+</sup>: 248.2009, found: 248.2002.

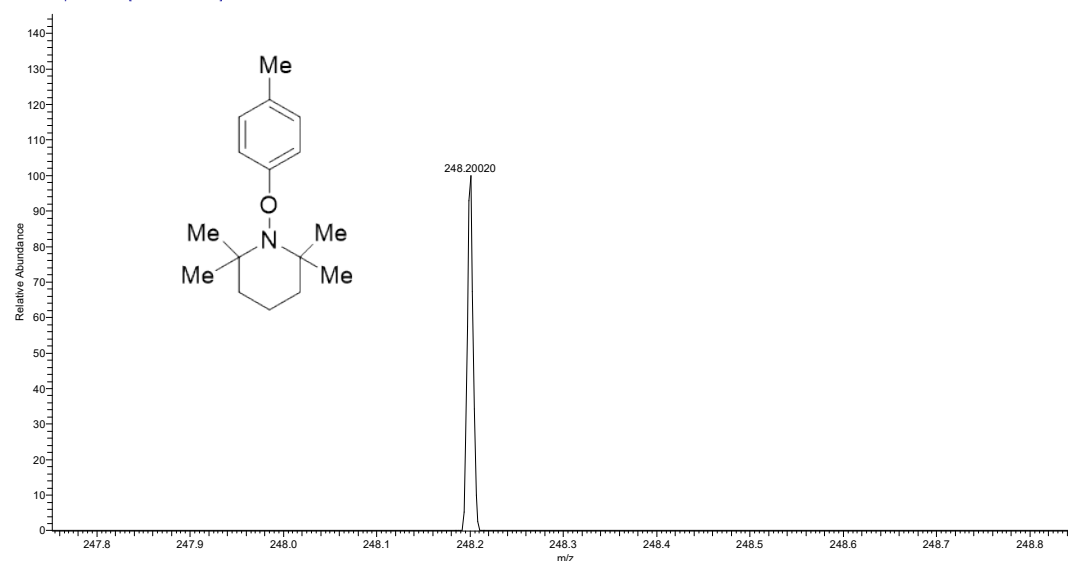

**Figure S2 High resolution mass spectrometry for free radical capture experiment**

#### 4.3.5 Electron paramagnetic resonance (EPR) experiments

A mixture of 1-methylindole-3-carbaldehyde **1a** (0.1 mmol, 15.9 mg), *p*-methylphenyltriazene **2a** (0.3 mmol, 56.7 mg), 5,5-dimethyl-1-pyrroline *N*-oxide (20  $\mu$ L), CH<sub>3</sub>OH (0.5 mL) and H<sub>2</sub>O (0.5 mL) was added and stirred at ambient temperature. Then, a solution of HPF<sub>6</sub> (60 wt.% solution in water, 0.06 mmol, 8.8  $\mu$ L) in CH<sub>3</sub>OH (0.5 mL) and H<sub>2</sub>O (0.5 mL) was added by dropwise to the above solution in 30 minutes. The reaction mixture was stirred at ambient temperature for 30 minutes, transferred to a capillary, and the EPR spectra were recorded. An obvious free radical signal was observed, which indicates that there are aryl radicals should be involved in the present reaction system. In another dried tube, were added 5,5-dimethyl-1-pyrroline *N*-oxide (20  $\mu$ L), CH<sub>3</sub>OH (0.5 mL) and H<sub>2</sub>O (0.5 mL) stirred at room temperature. Then, a solution of HPF<sub>6</sub> (0.06 mmol, 8.8  $\mu$ L) in CH<sub>3</sub>OH (0.5 mL) and H<sub>2</sub>O (0.5 mL) was added by dropwise to the above solution in 30 minutes as blank reaction. The reaction mixture was stirred at ambient temperature for 30 minutes, transferred to a capillary, and the EPR spectra were recorded, no free radical signal is generated.

Measurement conditions: frequency: 9.6 GHz; power: 0.9187 mW; modulation amplitude: 5 G; time constant: 20.48 ms; Sweep time: 20 s; Number of scans: 3.

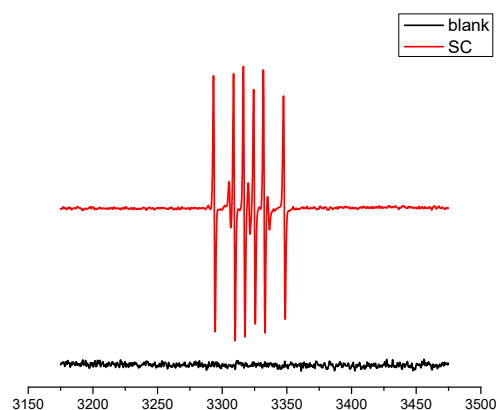

**Figure S3 Electron spin resonance (ESR) spectrum.**

#### 4.4 In-situ IR experiment

In a dried round bottom flask, were added MeOH (4 mL), 1-methylindole-3-carbaldehyde **1a** (0.2 mmol, 31.8 mg), *p*-methylphenyltriazene **2a** (0.6 mmol, 113.4 mg), HPF<sub>6</sub> (0.12 mmol, 17.6 μL). The mixture was allowed to stir at ambient temperature for 1 h and then recorded by in-situ IR.

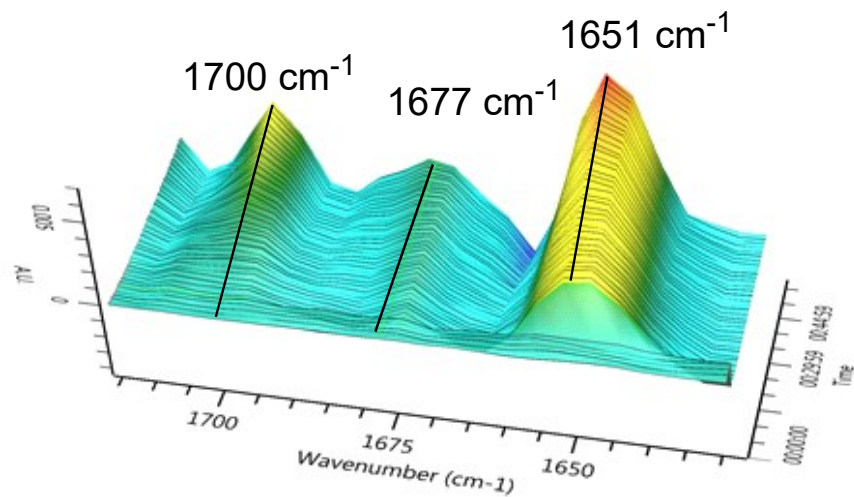

Figure S3b 3D-surface plot of the observed vibrations at 1677 cm<sup>-1</sup>



## 5. NMR Spectra

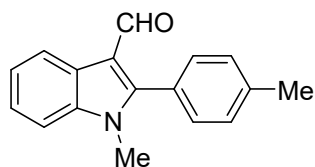

**1-Methyl-2-(*p*-tolyl)-1*H*-indole-3-carbaldehyde (3a):** Yellow semisolid, 19.6 mg, 79% yield. <sup>1</sup>H NMR (400 MHz, CDCl<sub>3</sub>) δ 9.74 (s, 1H), 8.45-8.42 (m, 1H), 7.39-7.32 (m, 7H), 3.67 (s, 3H), 2.48 (s, 3H); <sup>13</sup>C NMR (101 MHz, CDCl<sub>3</sub>) δ 186.69, 151.72, 140.05, 130.79, 129.35, 125.59, 125.22, 123.91, 123.23, 122.15, 115.33, 109.69, 30.96, 21.42; Known compound.<sup>[3]</sup>

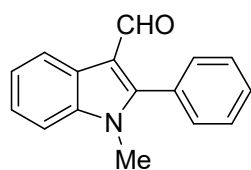

**1-Methyl-2-phenyl-1*H*-indole-3-carbaldehyde (3b):** Yellow semisolid, 15.8 mg, 67% yield. <sup>1</sup>H NMR (400 MHz, CDCl<sub>3</sub>) δ 9.73 (s, 1H), 8.48-8.44 (m, 1H), 7.87 (d, *J* = 8.4 Hz, 1H), 7.58-7.55 (m, 2H), 7.51-7.49 (m, 2H), 7.42-7.40 (m, 2H), 7.00 (d, *J* = 8.8 Hz, 1H), 3.68 (s, 3H); <sup>13</sup>C NMR (101 MHz, CDCl<sub>3</sub>) δ 186.79, 151.71, 137.37, 130.87, 129.90, 128.67, 128.53, 124.92, 124.09, 123.40, 122.18, 115.90, 109.79, 31.01; Known compound.<sup>[3]</sup>

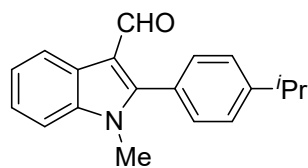

**2-(4-*iso*-Propylphenyl)-1-methyl-1*H*-indole-3-carbaldehyde (3c):** Yellow solid, 15.2 mg, 55% yield, mp: 99.0-100.5 °C. <sup>1</sup>H NMR (600 MHz, CDCl<sub>3</sub>) δ 9.75 (s, 1H), 8.45-8.42 (m, 1H), 7.42-7.41 (br, 4H), 7.40-7.39 (m, 1H), 7.38-7.35 (m, 2H), 3.69 (s, 3H), 3.03 (sept, *J* = 7.0 Hz, 1H), 1.34 (d, *J* = 6.9 Hz, 6H); <sup>13</sup>C NMR (101 MHz, CDCl<sub>3</sub>) δ 186.76, 151.77, 150.81, 137.33, 130.89, 126.72, 125.87, 125.21, 123.87, 122.74, 121.50, 115.62, 109.70, 34.04, 31.00, 23.83; HRMS (ESI<sup>+</sup>): *m/z* calcd. for C<sub>19</sub>H<sub>20</sub>NO [M+H]<sup>+</sup> : 278.1539, found: 278.1541.

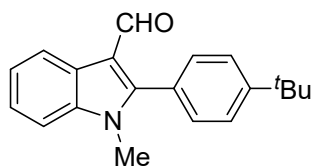

**2-(4-(*tert*-Butyl)phenyl)-1-methyl-1*H*-indole-3-carbaldehyde (3d):** Yellow solid, 12.2 mg, 42% yield, mp: 81.3-83.2 °C. <sup>1</sup>H NMR (400 MHz, CDCl<sub>3</sub>) δ 9.57 (s, 1H), 8.29-8.27 (m, 1H), 7.40 (d, *J* = 8.0 Hz, 2H), 7.24-7.15 (m, 3H), 7.08 (d, *J* = 8.1 Hz, 1H), 6.65 (d, *J* = 8.6 Hz, 1H), 3.52 (s, 3H), 1.24 (s, 9H); <sup>13</sup>C NMR (101 MHz, CDCl<sub>3</sub>) δ 187.03, 153.16, 137.38, 130.62, 126.27, 125.61, 125.41, 125.20, 123.95, 123.30, 122.13, 115.59, 114.81, 34.89, 31.52, 31.21; HRMS (ESI<sup>+</sup>): *m/z* calcd. for C<sub>20</sub>H<sub>22</sub>NO [M+H]<sup>+</sup> : 292.1696, found: 292.1696.

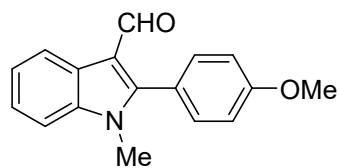

**2-(4-Methoxyphenyl)-1-methyl-1*H*-indole-3-carbaldehyde (3e):** Yellow solid, 19.2 mg, 72% yield, mp: 135.5-136.5 °C. <sup>1</sup>H NMR (400 MHz, CDCl<sub>3</sub>) δ 9.74 (s, 1H), 8.44-8.40 (m, 1H), 7.43-7.33 (m, 5H), 7.07 (d, *J* = 8.2 Hz,

2H), 3.91 (s, 3H), 3.67 (s, 3H);  $^{13}\text{C}$  NMR (101 MHz,  $\text{CDCl}_3$ )  $\delta$  186.66, 160.81, 151.56, 137.31, 132.25, 125.22, 123.86, 123.20, 122.46, 120.59, 115.61, 114.15, 109.68, 55.44, 30.93; Known compound.<sup>[4]</sup>

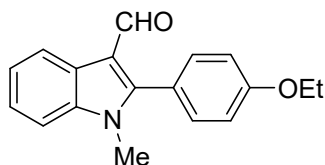

**2-(4-Ethoxyphenyl)-1-methyl-1H-indole-3-carbaldehyde (3f):** Yellow semisolid, 14.2 mg, 51% yield.  $^1\text{H}$  NMR (600 MHz,  $\text{CDCl}_3$ )  $\delta$  9.74 (s, 1H), 8.42 (d,  $J = 8.8$  Hz, 1H), 7.40 (s, 1H), 7.39 (d,  $J = 5.4$  Hz, 2H), 7.37-7.33 (m, 2H), 7.05 (d,  $J = 8.2$  Hz, 2H), 4.13 (q,  $J = 7.0$  Hz, 2H), 3.67 (s, 3H), 1.48 (t,  $J = 7.0$  Hz, 3H);  $^{13}\text{C}$  NMR (151 MHz,  $\text{CDCl}_3$ )  $\delta$  186.70, 160.21, 151.70, 137.31, 132.22, 125.22, 123.83, 123.17, 122.04, 120.34, 115.56, 114.59, 109.67, 63.70, 30.92, 14.74; HRMS (ESI<sup>+</sup>):  $m/z$  calcd. for  $\text{C}_{18}\text{H}_{18}\text{NO}_2$   $[\text{M}+\text{H}]^+$ : 280.1332, found: 280.1329.

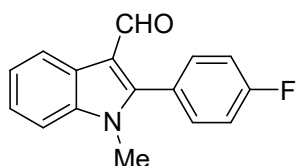

**2-(4-Fluorophenyl)-1-methyl-1H-indole-3-carbaldehyde (3g):** Yellow semisolid, 14.2 mg, 56% yield.  $^1\text{H}$  NMR (400 MHz,  $\text{DMSO}-d_6$ )  $\delta$  9.60 (s, 1H), 8.22 (d,  $J = 7.8$  Hz, 1H), 7.74 (td,  $J = 5.6, 2.2$  Hz, 2H), 7.66 (d,  $J = 8.1$  Hz, 1H), 7.46 (t,  $J = 6.6$  Hz, 2H), 7.38 (t,  $J = 7.2$  Hz, 1H), 7.32 (t,  $J = 7.5$  Hz, 1H), 3.68 (s, 3H);  $^{13}\text{C}$  NMR (101 MHz,  $\text{DMSO}-d_6$ )  $\delta$  185.33, 163.23 (d,  $J = 249.5$  Hz), 150.32, 137.28, 133.59 (d,  $J = 9.1$  Hz), 124.70, 123.60 (d,  $J = 83.8$  Hz), 121.04, 115.99 (d,  $J = 21.2$  Hz), 114.79, 111.21, 31.21. Known products.<sup>[4]</sup>

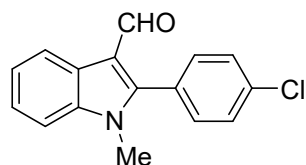

**2-(4-Chlorophenyl)-1-methyl-1H-indole-3-carbaldehyde (3h):** Yellow semisolid, 19.4 mg, 72% yield.  $^1\text{H}$  NMR (400 MHz,  $\text{DMSO}-d_6$ )  $\delta$  9.62 (s, 1H), 8.23 (dt,  $J = 7.5, 1.0$  Hz, 1H), 7.73-7.65 (m, 5H), 7.39 (td,  $J = 7.2$  Hz, 1.3, 1H), 7.32 (td,  $J = 7.9, 1.1$ , 1H), 3.69 (s, 3H);  $^{13}\text{C}$  NMR (101 MHz,  $\text{DMSO}-d_6$ )  $\delta$  185.30, 149.90, 137.36, 135.17, 133.03, 128.96, 127.19, 125.10, 124.10, 123.22, 121.09, 115.32, 111.25, 31.27. Known products.<sup>[5]</sup>

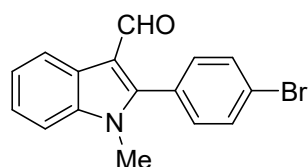

**2-(4-Bromophenyl)-1-methyl-1H-indole-3-carbaldehyde (3i):** Yellow semisolid, 26.7 mg, 85% yield.  $^1\text{H}$  NMR (400 MHz,  $\text{CDCl}_3$ )  $\delta$  9.73 (s, 1H), 8.43 (d,  $J = 7.3$  Hz, 1H), 7.71 (d,  $J = 8.0$  Hz, 2H), 7.42-7.33 (m, 5H), 3.67 (s, 3H);  $^{13}\text{C}$  NMR (101 MHz,  $\text{CDCl}_3$ )  $\delta$  186.61, 137.38, 132.34, 132.00, 127.53, 125.10, 124.62, 124.28, 123.48, 122.22, 117.29, 115.88, 109.79, 31.01; HRMS (ESI<sup>+</sup>):  $m/z$  calcd. for  $\text{C}_{16}\text{H}_{13}\text{BrNO}$   $[\text{M}+\text{H}]^+$ : 314.0175, found: 314.0174.

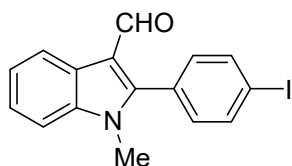

**2-(4-Iodophenyl)-1-methyl-1H-indole-3-carbaldehyde (3j):** Yellow solid, 8.3 mg, 23% yield, mp: 146.6-147.7 °C.  $^1\text{H}$  NMR (400 MHz,  $\text{CDCl}_3$ )  $\delta$  9.63 (s, 1H), 8.34 (d,  $J = 6.1$  Hz, 1H), 7.82 (d,  $J = 7.8$  Hz, 2H), 7.35-7.25 (m, 3H), 7.13 (d,  $J = 7.9$  Hz, 2H), 3.58 (s, 3H);  $^{13}\text{C}$  NMR (101 MHz,  $\text{CDCl}_3$ )  $\delta$  186.92, 149.96, 137.89, 132.37, 127.99,

125.05, 124.25, 123.45, 122.14, 118.01, 115.72, 109.80, 96.46, 31.01; HRMS (ESI<sup>+</sup>): *m/z* calcd. for C<sub>16</sub>H<sub>13</sub>INO [M+H]<sup>+</sup> : 362.0036, found: 362.0039.

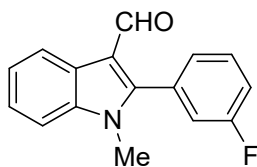

**2-(3-Fluorophenyl)-1-methyl-1H-indole-3-carbaldehyde (3k):** Yellow solid, 16.0 mg, 63% yield, mp: 180.5 - 181.5 °C. <sup>1</sup>H NMR (600 MHz, CDCl<sub>3</sub>) δ 9.75 (s, 1H), 8.43 (d, *J* = 8.8 Hz, 1H), 7.57-7.53 (m, 1H), 7.41 (d, *J* = 4.6 Hz, 2H), 7.38 (td, *J* = 7.6, 2.6 Hz, 1H), 7.29 (d, *J* = 8.1 Hz, 2H), 7.22 (dt, *J* = 9.1, 2.1 Hz, 1H), 3.69 (s, 3H); <sup>13</sup>C NMR (151 MHz, CDCl<sub>3</sub>) δ 186.22, 162.43(d, *J* = 249.2 Hz), 149.55, 137.35, 130.63 (d, *J* = 9.1 Hz), 130.45 (d, *J* = 9.1 Hz), 126.82, 125.02, 124.33, 123.51, 122.26, 117.94 (d, *J* = 22.7 Hz), 117.04 (d, *J* = 21.1 Hz), 115.91, 109.83, 31.04; <sup>19</sup>F NMR (565 MHz, CDCl<sub>3</sub>) δ -111.33; HRMS (ESI<sup>+</sup>): *m/z* calcd. for C<sub>16</sub>H<sub>13</sub>FNO [M+H]<sup>+</sup> : 254.0976, found: 254.0973.

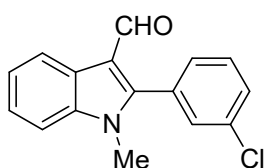

**2-(3-Chlorophenyl)-1-methyl-1H-indole-3-carbaldehyde (3l):** Yellow semisolid, 15.3 mg, 57% yield. <sup>1</sup>H NMR (600 MHz, CDCl<sub>3</sub>) δ 9.71 (s, 1H), 8.43 (d, *J* = 7.1 Hz, 1H), 7.56 (d, *J* = 8.2 Hz, 1H), 7.52 (d, *J* = 7.7 Hz, 1H), 7.50 (s, 1H), 7.42-7.41 (m, 2H), 7.40-7.38 (m, 2H), 3.69 (s, 3H); <sup>13</sup>C NMR (151 MHz, CDCl<sub>3</sub>) δ 186.89, 137.38, 134.82, 130.71, 130.30, 130.16, 130.00, 129.09, 124.98, 124.44, 123.64, 118.64, 117.13, 115.93, 109.89, 31.09; HRMS (ESI<sup>+</sup>): *m/z* calcd. for C<sub>16</sub>H<sub>12</sub>ClNO [M+H]<sup>+</sup> : 294.0470, found: 294.0461.

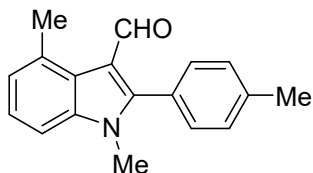

**1,4-Dimethyl-2-(4-tolyl)-1H-indole-3-carbaldehyde (3m):** Yellow brown solid, 13.2 mg, 50% yield, mp: 107.9-109.3 °C. <sup>1</sup>H NMR (400 MHz, CDCl<sub>3</sub>) δ 9.68 (s, 1H), 7.34-7.27 (m, 4H), 7.23 (d, *J* = 7.6 Hz, 1H), 7.17 (d, *J* = 8.1 Hz, 1H), 7.10 (d, *J* = 7.1 Hz, 1H), 3.54 (s, 3H), 2.95 (s, 3H), 2.45 (s, 3H); <sup>13</sup>C NMR (101 MHz, CDCl<sub>3</sub>) δ 185.82, 152.68, 139.73, 137.98, 133.19, 130.72, 129.11, 126.16, 124.78, 124.16, 123.89, 116.83, 107.20, 30.84, 23.00, 21.31; HRMS (ESI<sup>+</sup>): *m/z* calcd. for C<sub>18</sub>H<sub>18</sub>NO [M+H]<sup>+</sup> : 264.1383, found: 264.1382.

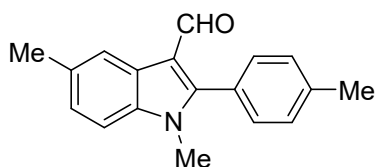

**1,5-Dimethyl-2-(4-tolyl)-1H-indole-3-carbaldehyde (3n):** Yellow semisolid, 9.3 mg, 35% yield. <sup>1</sup>H NMR (400 MHz, CDCl<sub>3</sub>) δ 9.70 (s, 1H), 8.24 (s, 1H), 7.38-7.30 (m, 4H), 7.27 (d, *J* = 11.7 Hz, 1H), 7.19 (d, *J* = 8.4 Hz, 1H), 3.63 (s, 3H), 2.51 (s, 3H), 2.47 (s, 3H); <sup>13</sup>C NMR (101 MHz, CDCl<sub>3</sub>) δ 186.69, 151.71, 139.94, 135.72, 132.97, 130.76, 129.30, 125.69, 125.40, 125.32, 121.86, 115.29, 109.34, 30.96, 21.46, 21.40; HRMS (ESI<sup>+</sup>): *m/z* calcd. for C<sub>18</sub>H<sub>18</sub>NO [M+H]<sup>+</sup> : 264.1383, found: 264.1383.

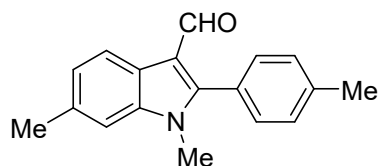

**1,6-Dimethyl-2-(4-tolyl)-1H-indole-3-carbaldehyde (3o):** Yellow solid, 12.6 mg, 48% yield, mp: 138.1-139.3 °C. <sup>1</sup>H NMR (400 MHz, CDCl<sub>3</sub>) δ 9.68 (s, 1H), 8.22 (s, 1H), 7.36-7.30 (m, 4H), 7.24 (d, *J* = 3.4 Hz, 1H), 7.16 (d, *J* = 8.4 Hz, 1H), 3.61 (s, 3H), 2.49 (s, 3H), 2.45 (s, 3H); <sup>13</sup>C NMR (101 MHz, CDCl<sub>3</sub>) δ 186.69, 151.71, 139.94, 135.72, 132.97, 130.76, 129.30, 125.69, 125.40, 125.32, 121.86, 115.29, 109.34, 30.96, 21.46, 21.40; HRMS (ESI<sup>+</sup>): *m/z* calcd. for C<sub>18</sub>H<sub>18</sub>NO [M+H]<sup>+</sup> : 264.1383, found: 264.1382.

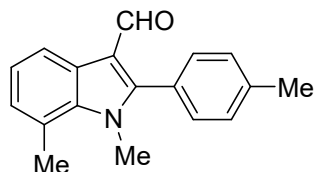

**1,7-Dimethyl-2-(4-tolyl)-1H-indole-3-carbaldehyde (3p):** Yellow solid, 8.2 mg, 31% yield, mp: 152.8-153.9 °C. <sup>1</sup>H NMR (400 MHz, CDCl<sub>3</sub>) δ 9.68 (s, 1H), 8.33 (d, *J* = 7.9 Hz, 1H), 7.40-7.29 (m, 4H), 7.21 (t, *J* = 7.6 Hz, 1H), 7.07 (d, *J* = 7.2 Hz, 1H), 3.86 (s, 3H), 2.80 (s, 3H), 2.48 (s, 3H); <sup>13</sup>C NMR (101 MHz, CDCl<sub>3</sub>) δ 186.73, 152.68, 139.92, 135.48, 130.87, 129.25, 126.96, 126.05, 125.73, 123.18, 121.41, 120.01, 115.56, 34.41, 21.36, 20.15; HRMS (ESI<sup>+</sup>): *m/z* calcd. for C<sub>18</sub>H<sub>18</sub>NO [M+H]<sup>+</sup> : 264.1383, found: 264.1384.

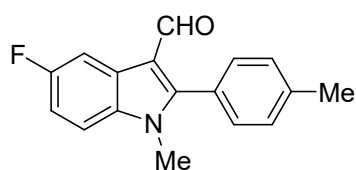

**5-Fluoro-1-methyl-2-(4-tolyl)-1H-indole-3-carbaldehyde (3q):** Yellow solid, 12.1 mg, 45% yield, mp: 199.0-200.9 °C. <sup>1</sup>H NMR (400 MHz, CDCl<sub>3</sub>) δ 9.70 (s, 1H), 8.10 (dd, *J* = 9.3, 2.6 Hz, 1H), 7.37 (br, 4H), 7.31 (dd, *J* = 8.8, 4.2 Hz, 1H), 7.09 (td, *J* = 9.0, 2.6 Hz, 1H), 3.66 (s, 3H), 2.48 (s, 3H); <sup>13</sup>C NMR (101 MHz, CDCl<sub>3</sub>) δ 186.39, 160.23 (d, *J* = 278.8), 151.98, 140.27, 133.83, 130.69, 129.44, 125.88 (d, *J* = 12.1), 124.80, 115.56, 112.06 (d, *J* = 26.3), 110.51 (d, *J* = 9.1 Hz), 107.59 (d, *J* = 24.2), 30.59, 21.88; <sup>19</sup>F NMR (565 MHz, CDCl<sub>3</sub>) δ -120.07; HRMS (ESI<sup>+</sup>): *m/z* calcd. for C<sub>17</sub>H<sub>15</sub>FNO [M+H]<sup>+</sup> : 268.1132, found: 268.1133.

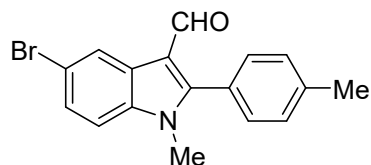

**5-Bromo-1-methyl-2-(4-tolyl)-1H-indole-3-carbaldehyde (3r):** Yellow solid, 14.4 mg, 44% yield, mp: 160.1-161.7 °C. <sup>1</sup>H NMR (400 MHz, CDCl<sub>3</sub>) δ 9.62 (s, 1H), 8.51 (d, *J* = 1.9 Hz, 1H), 7.37 (dd, *J* = 8.6, 2.0 Hz, 1H), 7.29 (br, 4H), 7.17 (d, *J* = 9.2 Hz, 1H), 3.58 (s, 3H), 2.41 (s, 3H); <sup>13</sup>C NMR (101 MHz, CDCl<sub>3</sub>) δ 186.38, 152.18, 140.37, 136.04, 130.71, 129.47, 126.82, 126.73, 125.10, 124.70, 116.75, 115.01, 111.13, 31.10, 21.43; HRMS (ESI<sup>+</sup>): *m/z* calcd. for C<sub>17</sub>H<sub>15</sub>BrNO [M+H]<sup>+</sup> : 328.0331, found: 328.0336.

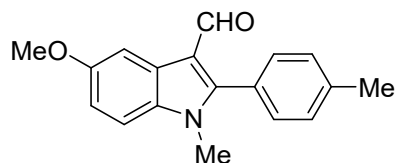

**5-Methoxy-1-methyl-2-(4-tolyl)-1H-indole-3-carbaldehyde (3s):** Yellow solid, 15.7 mg, 56% yield, mp: 123.5-125.1 °C. <sup>1</sup>H NMR (400 MHz, CDCl<sub>3</sub>) δ 9.66 (s, 1H), 7.89 (d, *J* = 2.5 Hz, 1H), 7.34-7.28 (m, 4H), 7.22 (dd, *J* = 8.2, 3.0 Hz, 2H), 6.95 (dd, *J* = 8.8, 2.5 Hz, 1H), 3.88 (s, 3H), 3.59 (s, 3H), 2.42 (s, 3H); <sup>13</sup>C NMR (101 MHz, CDCl<sub>3</sub>) δ 186.64, 156.88, 151.60, 139.94, 132.22, 130.74, 129.31, 125.96, 125.65, 115.47, 114.17, 110.55, 103.34, 55.85, 31.04, 21.39; HRMS (ESI<sup>+</sup>): *m/z* calcd. for C<sub>18</sub>H<sub>18</sub>NO<sub>2</sub> [M+H]<sup>+</sup> : 280.1332, found: 280.1333.

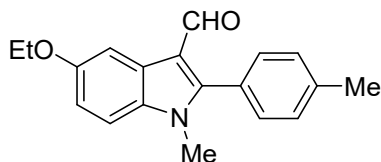

**5-Ethoxy-1-methyl-2-(4-tolyl)-1H-indole-3-carbaldehyde (3t):** Yellow brown solid, 14.7 mg, 50% yield, mp: 114.6-116.0 °C. <sup>1</sup>H NMR (400 MHz, CDCl<sub>3</sub>) δ 9.65 (s, 1H), 7.88 (s, 1H), 7.30 (br, 4H), 7.21 (d, *J* = 6.4 Hz, 1H), 6.94 (dd, *J* = 8.9, 2.2 Hz, 1H), 4.11 (q, *J* = 6.9 Hz, 2H), 3.58 (s, 3H), 2.42 (s, 3H), 1.41 (t, *J* = 5.4 Hz, 3H); <sup>13</sup>C NMR (101 MHz, CDCl<sub>3</sub>) δ 186.58, 156.72, 151.57, 139.89, 132.18, 130.72, 129.28, 125.94, 125.65, 115.42, 114.56, 110.50, 104.29, 64.03, 31.00, 21.36, 14.89; HRMS (ESI<sup>+</sup>): *m/z* calcd. for C<sub>19</sub>H<sub>20</sub>NO<sub>2</sub> [M+H]<sup>+</sup> : 294.1489, found: 294.1487.

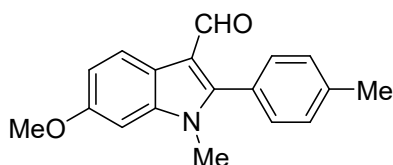

**6-Methoxy-1-methyl-2-(4-tolyl)-1H-indole-3-carbaldehyde (3u):** Yellow solid, 15.3 mg, 55% yield, mp: 130.7-132.4 °C. <sup>1</sup>H NMR (400 MHz, CDCl<sub>3</sub>) δ 9.69 (s, 1H), 8.29 (d, *J* = 8.6 Hz, 1H), 7.37-7.29 (m, 4H), 6.98 (d, *J* = 8.8 Hz, 1H), 6.83 (s, 1H), 3.91 (s, 3H), 3.61 (s, 3H), 2.47 (s, 3H); <sup>13</sup>C NMR (101 MHz, CDCl<sub>3</sub>) δ 186.57, 157.55, 151.13, 139.84, 138.32, 130.76, 129.27, 125.62, 122.76, 119.15, 115.55, 111.94, 93.83, 55.69, 30.92, 21.36; HRMS (ESI<sup>+</sup>): *m/z* calcd. for C<sub>18</sub>H<sub>18</sub>NO<sub>2</sub> [M+H]<sup>+</sup> : 280.1332, found: 280.1333.

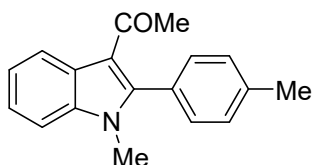

**1-(1-Methyl-2-(4-tolyl)-1H-indol-3-yl)ethan-1-one (3v):** Yellow semisolid, 14.5 mg, 55% yield. <sup>1</sup>H NMR (400 MHz, DMSO-*d*<sub>6</sub>) δ 8.30 (dt, *J* = 8.5, 0.8 Hz, 1H), 7.56 (dt, *J* = 8.2, 0.8 Hz, 1H), 7.42 (br, 4H), 7.30 (td, *J* = 7.1, 1.4 Hz, 1H), 7.25 (td, *J* = 7.1, 1.3 Hz, 1H), 3.49 (s, 3H), 2.44 (s, 3H), 1.85 (s, 3H); <sup>13</sup>C NMR (151 MHz, CDCl<sub>3</sub>) δ 194.76, 146.71, 139.72, 136.63, 130.11, 129.53, 129.08, 126.71, 123.25, 122.73, 115.89, 109.38, 30.77, 30.16, 21.45; HRMS (ESI<sup>+</sup>): *m/z* calcd. for C<sub>18</sub>H<sub>18</sub>NO [M+Na]<sup>+</sup> : 286.1202, found: 286.1199.

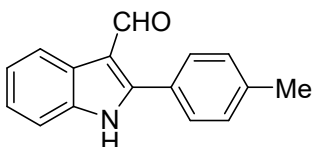

**2-(4-tolyl)-1H-indole-3-carbaldehyde (3w):** Yellow solid, 14.5 mg, 55% yield, mp: 211.0-212.3 °C. <sup>1</sup>H NMR (600 MHz, CDCl<sub>3</sub>) δ 10.08 (s, 1H), 8.78 (s, 1H), 8.44-8.41 (m, 1H), 7.54 (d, *J* = 8.1 Hz, 2H), 7.44-7.42 (m, 1H), 7.35 (d, *J* = 7.8 Hz, 2H), 7.32 (dd, *J* = 6.0, 3.1 Hz, 2H), 2.46 (s, 3H); <sup>13</sup>C NMR (151 MHz, CDCl<sub>3</sub>) δ 186.85, 149.28, 140.46, 135.40, 129.92, 127.10, 126.25, 124.29, 123.19, 122.31, 114.79, 110.98, 21.42; HRMS (ESI<sup>+</sup>): *m/z* calcd. for C<sub>16</sub>H<sub>13</sub>NO [M+H]<sup>+</sup> : 208.1121, found: 208.1117. Known compound.<sup>[6]</sup>

## 6. References

1. N. Jacob, Y. Zaid, J. C. A. Oliveira, L. Ackermann and J. Wencel-Delord, *J. Am. Chem. Soc.*, **2022**, *144*, 798-806.
2. L. G. Margaret, H. B. David and M. W. Willard, *J. Org. Chem.*, **1993**, *58*, 2104-2109.
3. C-Y. Wu, M. Hu, Y. Liu, R-J. Song, Y. Lei, B-X. Tang, R-J Li and J-H Li, *Chem. Commun.*, **2012**, *48*, 3197-3199.
4. M. Chen, J. L. Peng, T. T. Mao and J. B. Huang, *Org. Lett.*, **2014**, *16*, 6286-6289.
5. D. J. Gale, J. Lin and J. F. K. Wilshire, *Aust. J. Chem.*, **1976**, *29*, 2747-2751.
6. Y. M. Yuan, X. M. Guo, X. F. Zhang, B. H. Li and Q. F. Huang, *Org. Chem. Front.*, **2020**, *7*, 3146-3159.

## 7. Copies of $^1\text{H}$ NMR and $^{13}\text{C}$ NMR for the Products

### $^1\text{H}$ NMR of product 3a in $\text{CDCl}_3$ (400 MHz)

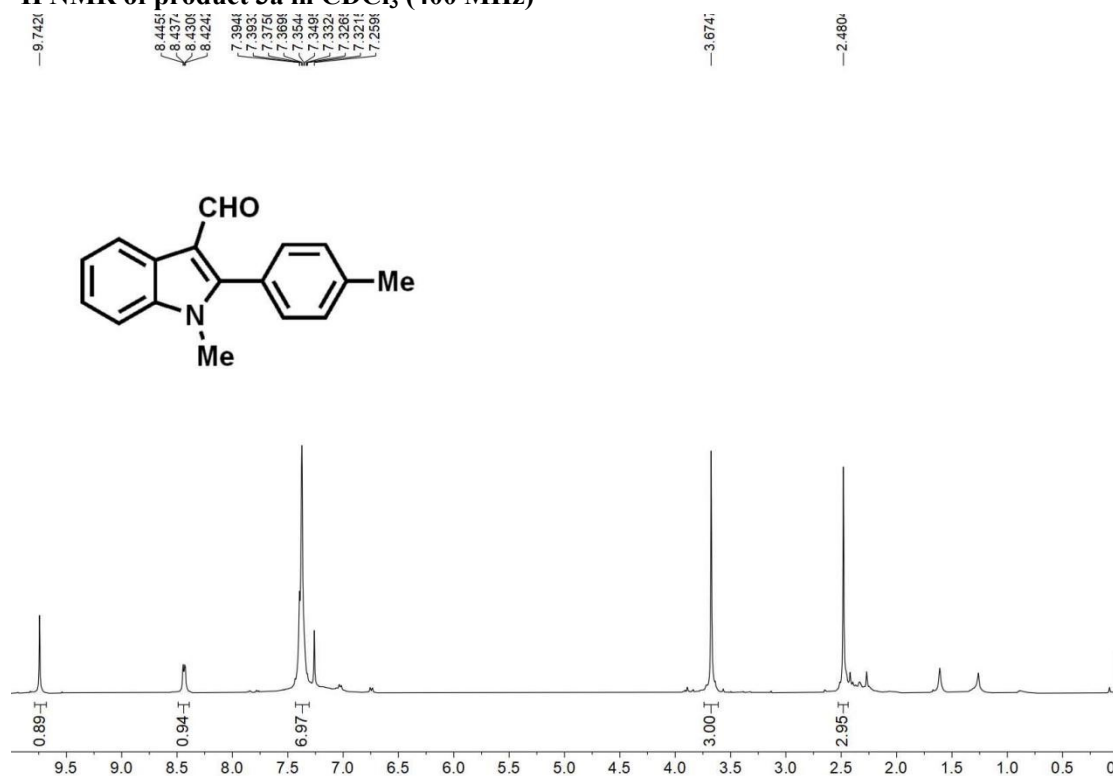

### $^{13}\text{C}$ NMR of product 3a in $\text{CDCl}_3$ (101 MHz)

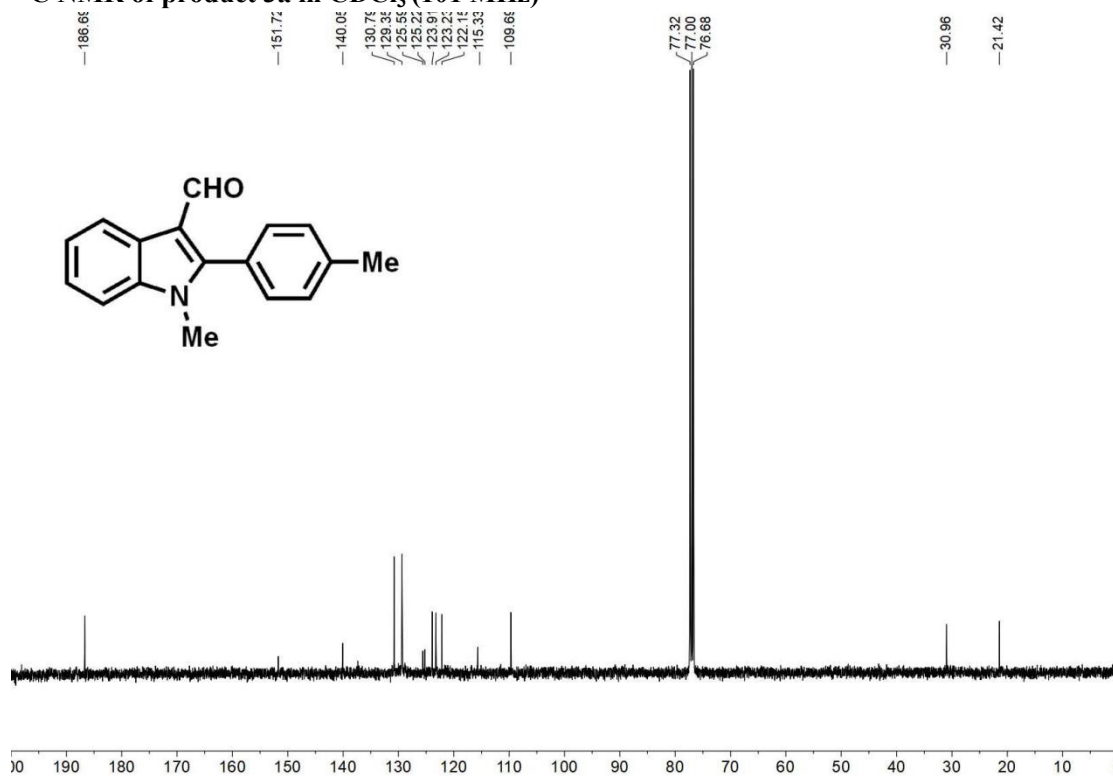

**<sup>1</sup>H NMR of product 3b in CDCl<sub>3</sub> (400 MHz)**

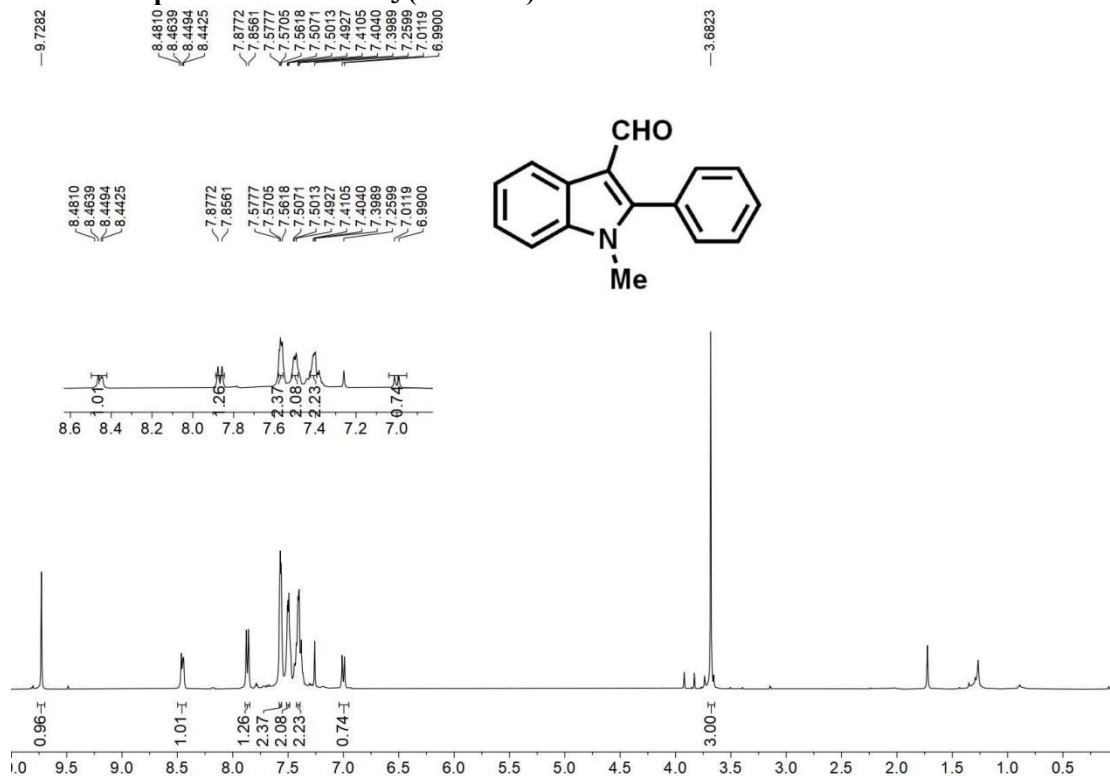

**<sup>13</sup>C NMR of product 3b in CDCl<sub>3</sub> (101 MHz)**

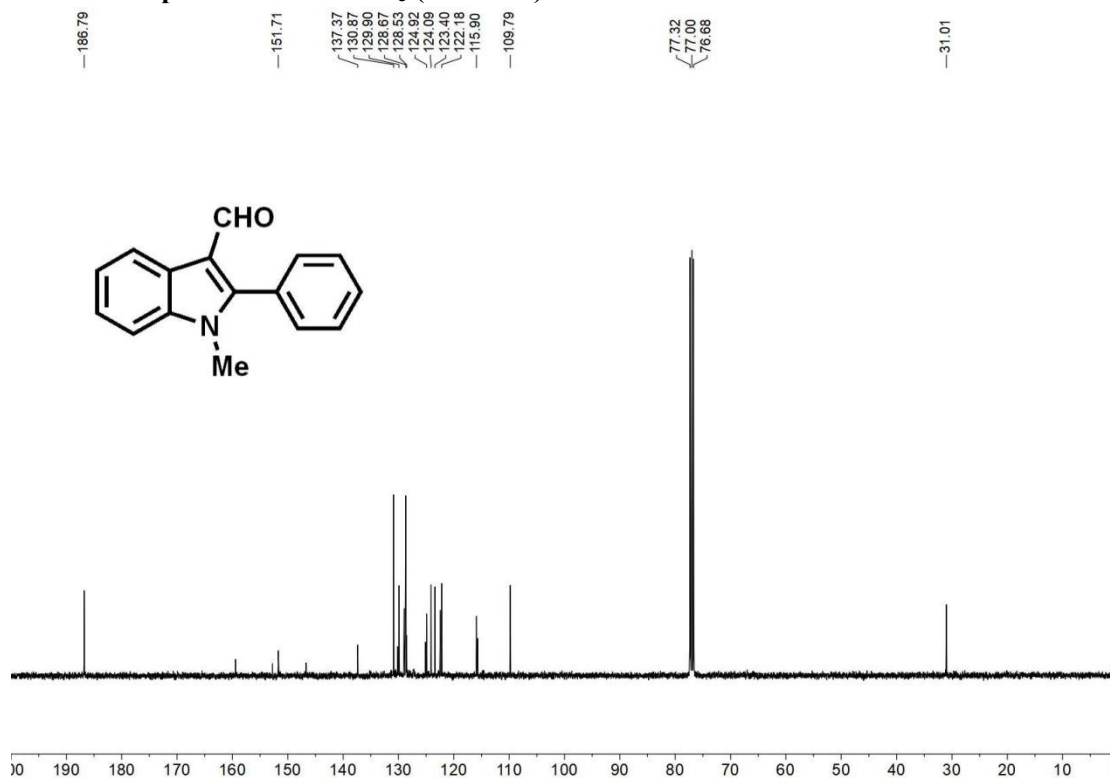



**$^1\text{H}$  NMR of product 3c in  $\text{CDCl}_3$  (600 MHz)**

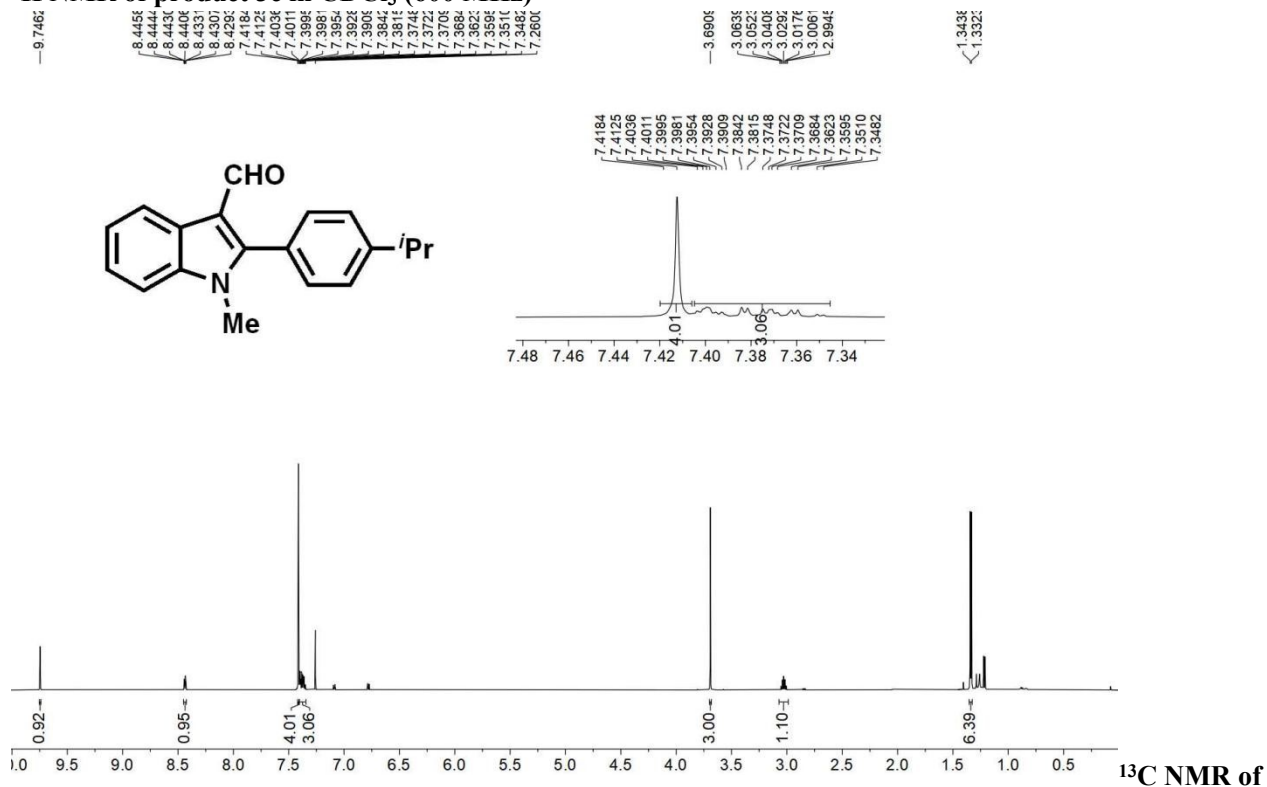

**product 3c in  $\text{CDCl}_3$  (101 MHz)**

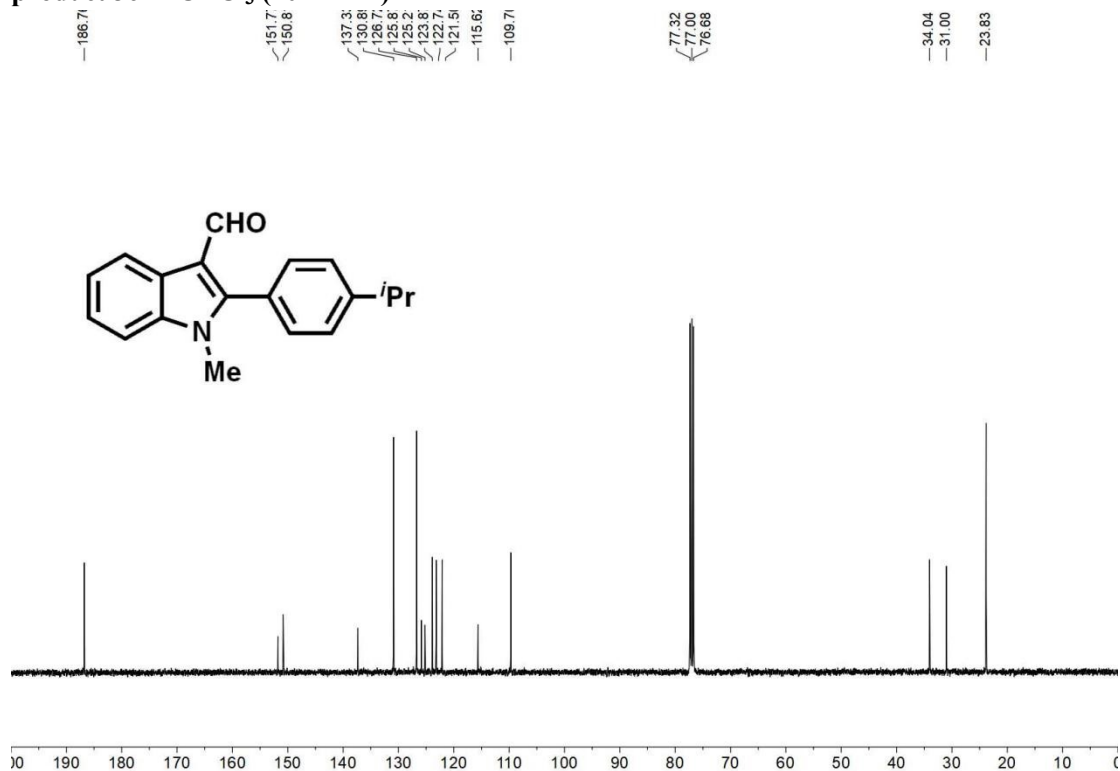

**<sup>1</sup>H NMR of product 3d in CDCl<sub>3</sub> (400 MHz)**

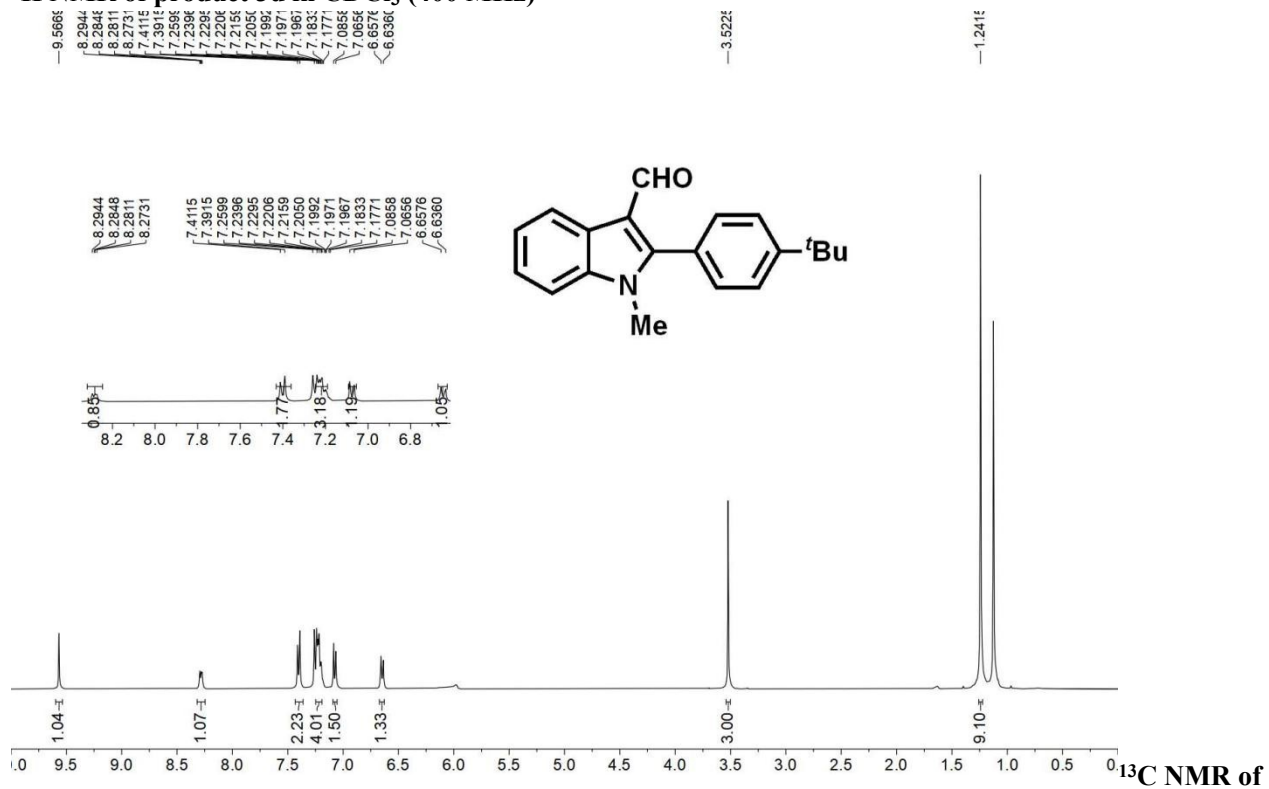

**product 3d in CDCl<sub>3</sub> (101 MHz)**

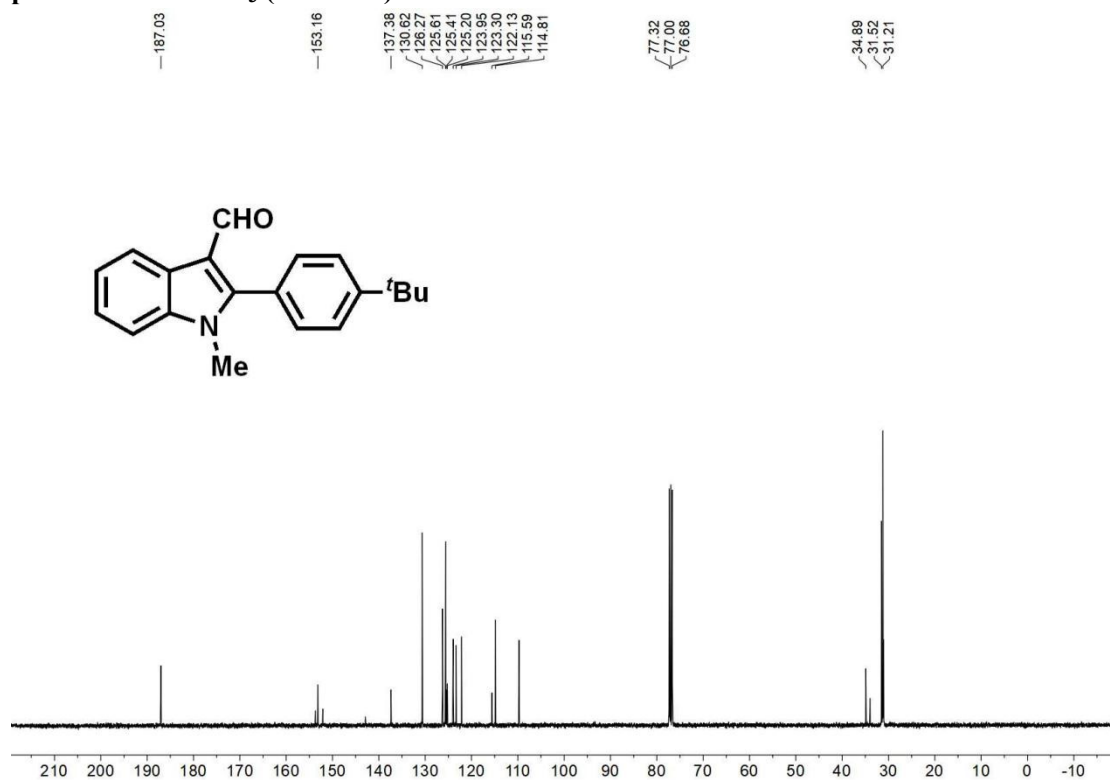

**<sup>1</sup>H NMR of product 3e in CDCl<sub>3</sub> (400 MHz)**

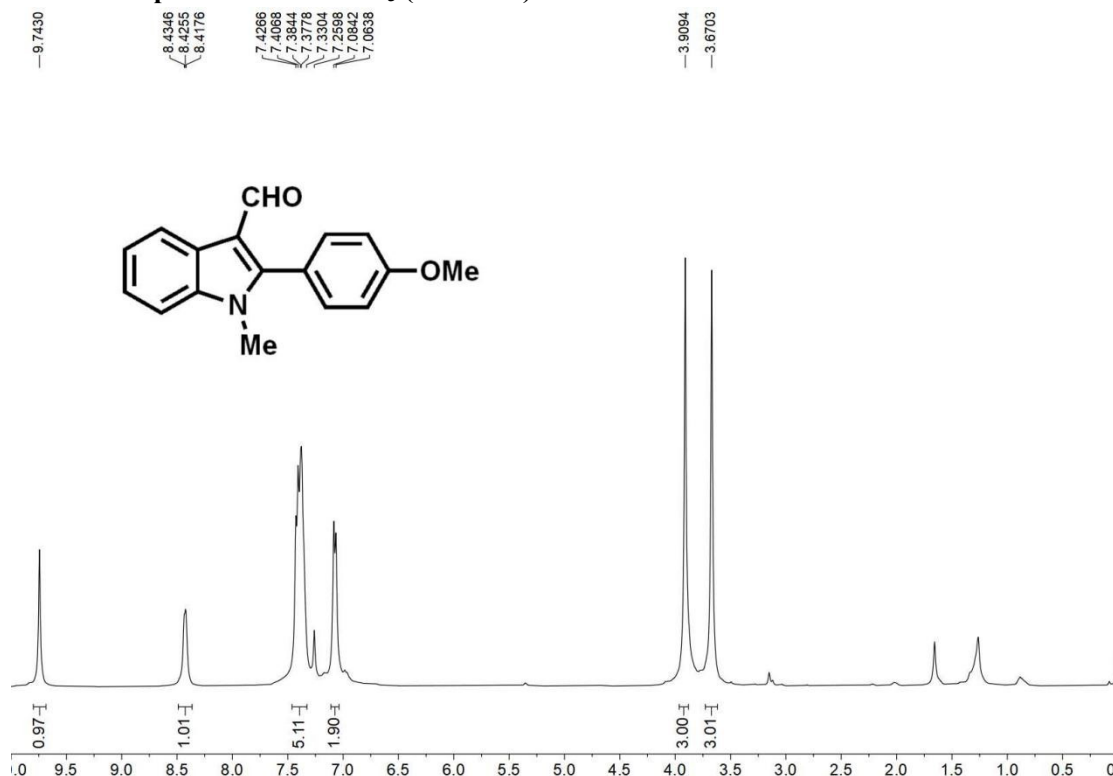

**<sup>13</sup>C NMR of product 3e in CDCl<sub>3</sub> (101 MHz)**

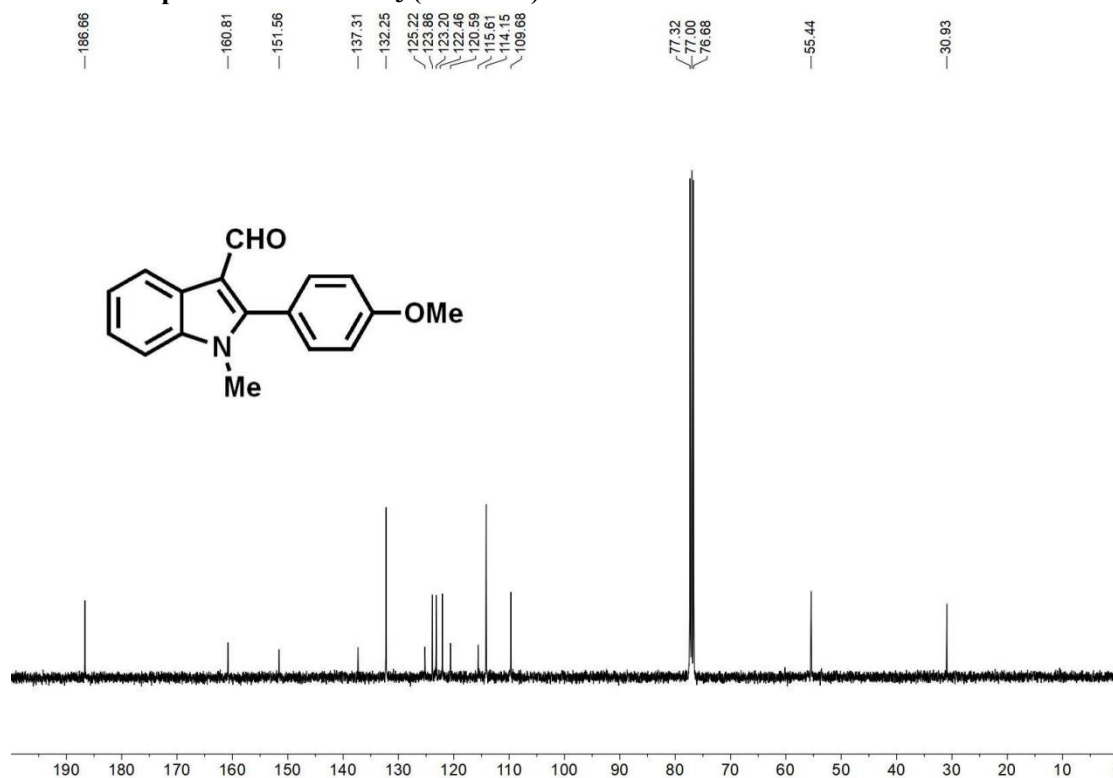

**<sup>1</sup>H NMR of product 3f in CDCl<sub>3</sub> (600 MHz)**

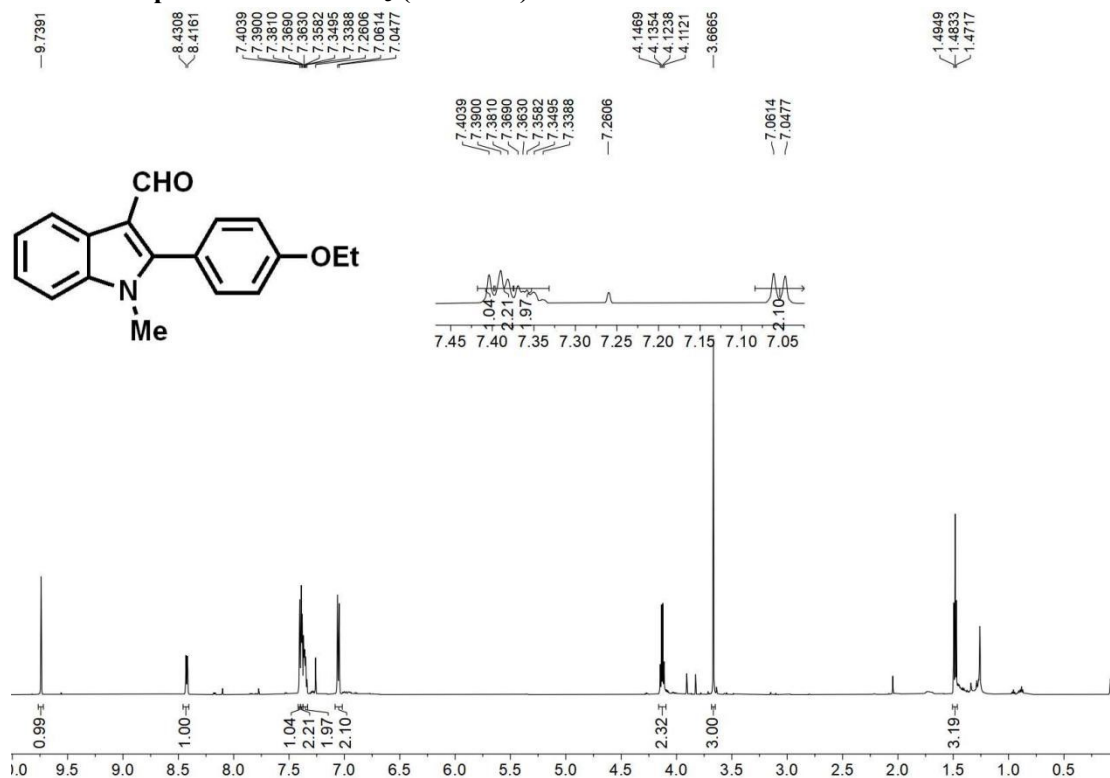

**<sup>13</sup>C NMR of product 3f in CDCl<sub>3</sub> (151 MHz)**

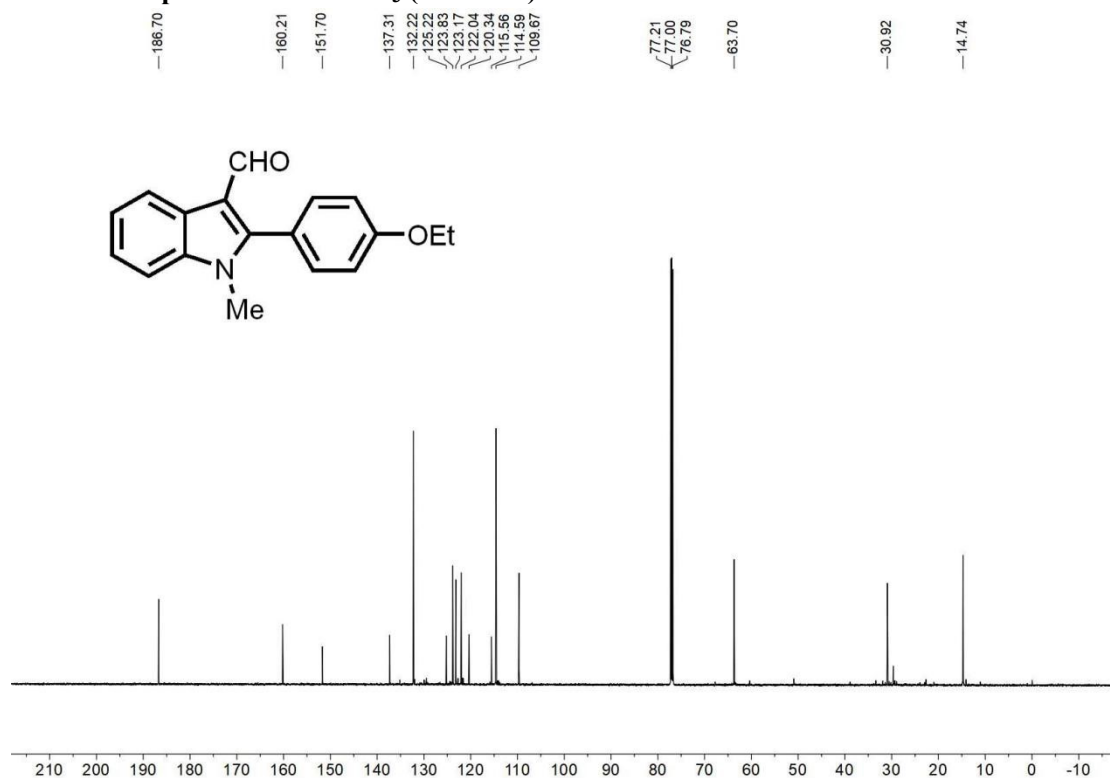

### <sup>1</sup>H NMR of product 3g in DMSO (400 MHz)

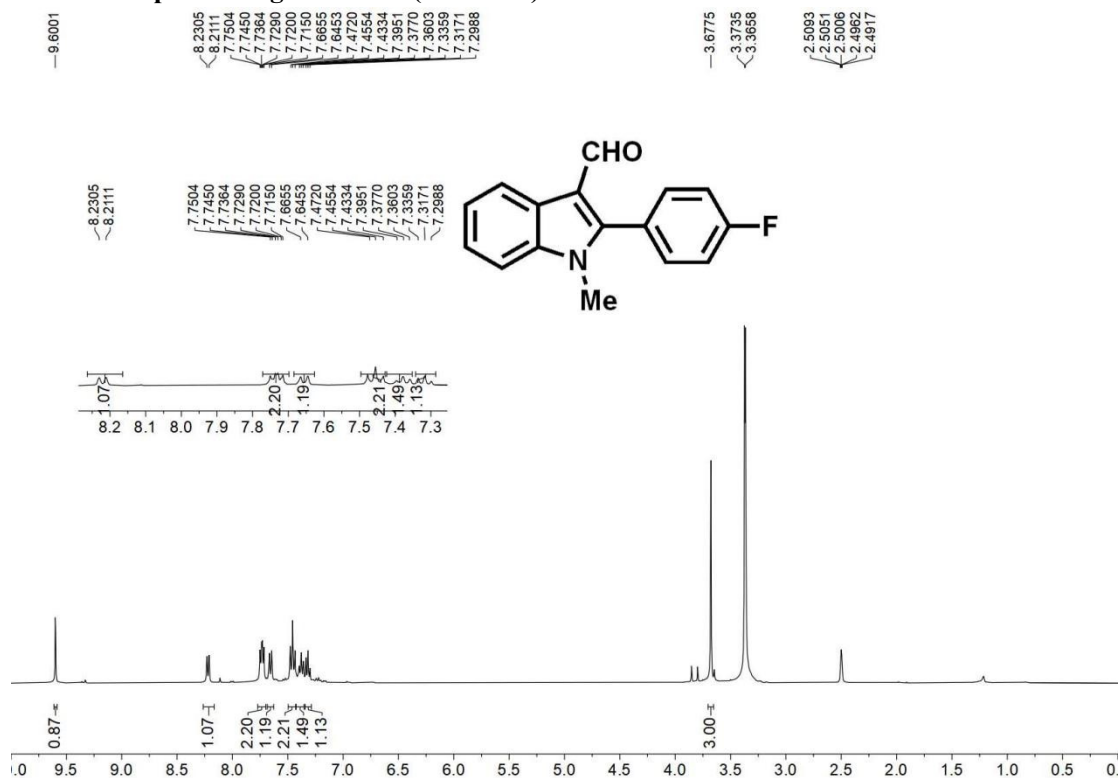

### <sup>13</sup>C NMR of product 3g in DMSO (101 MHz)

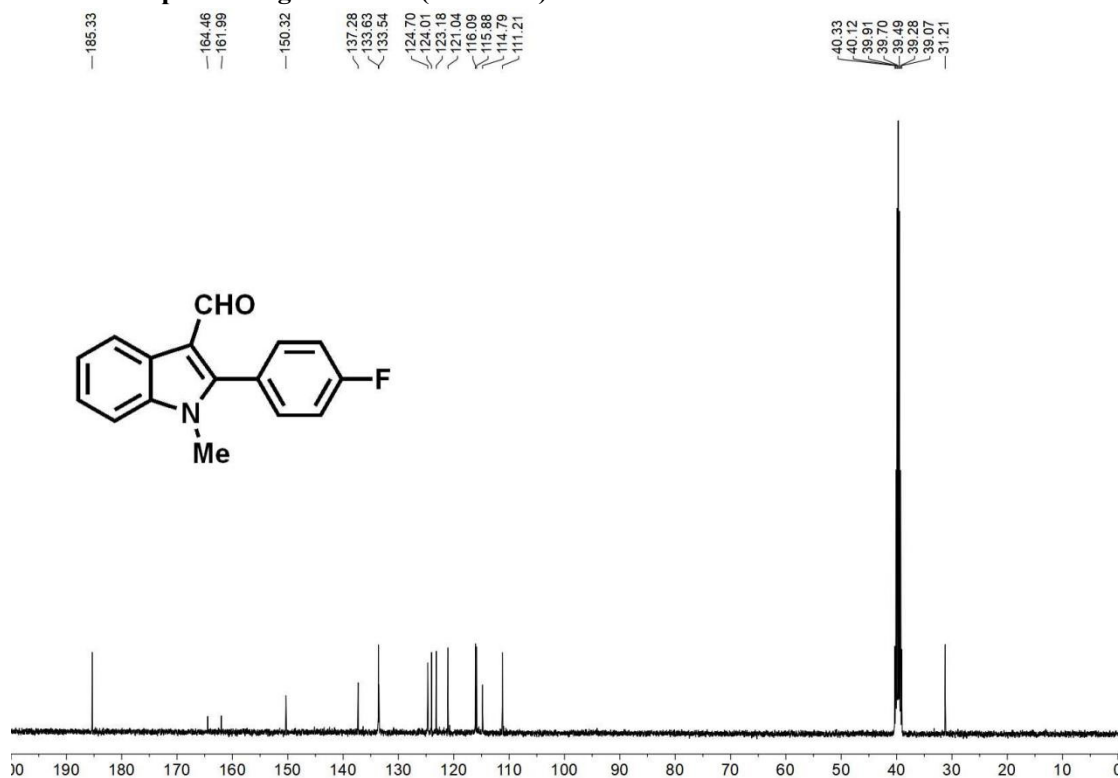

### <sup>1</sup>H NMR of product 3h in DMSO (400 MHz)

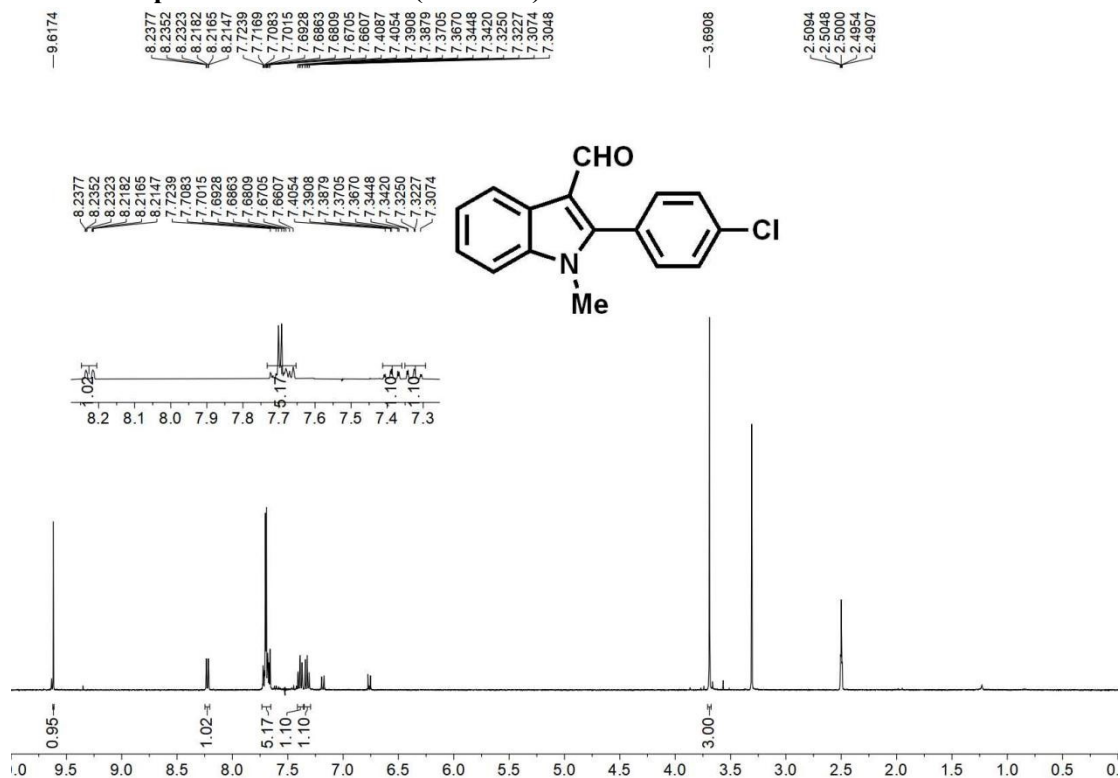

### <sup>13</sup>C NMR of product 3h in DMSO (101 MHz)

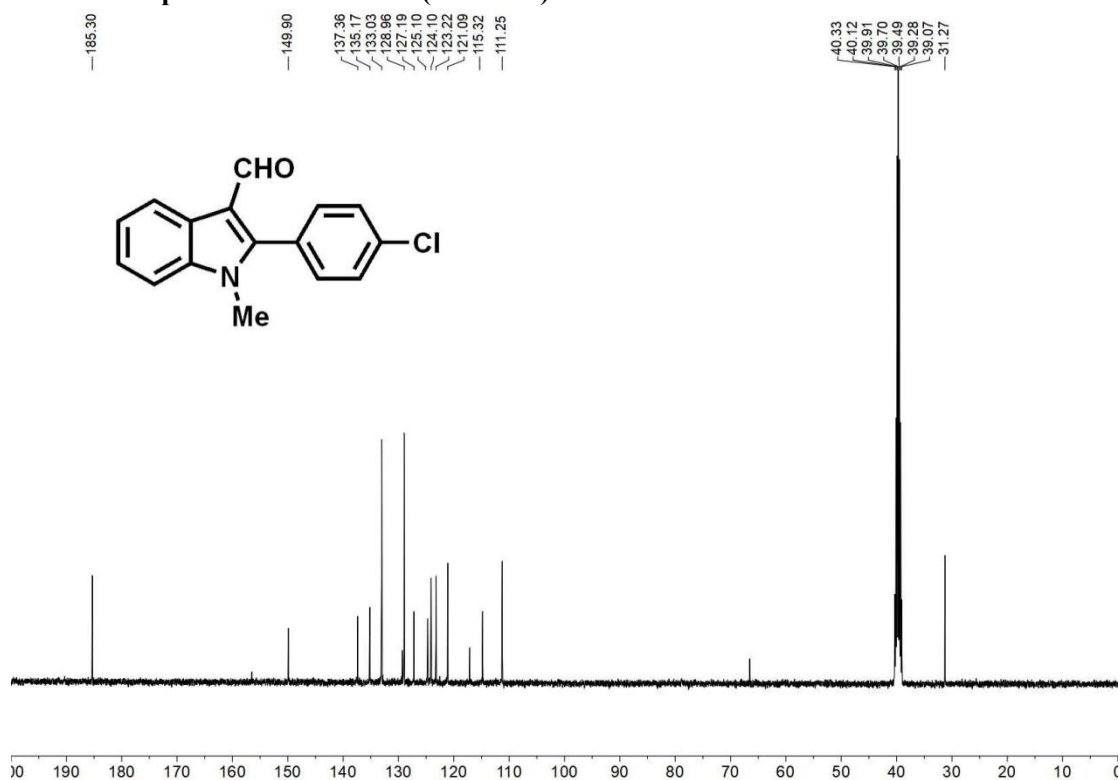

**<sup>1</sup>H NMR of product 3i in CDCl<sub>3</sub> (400 MHz)**

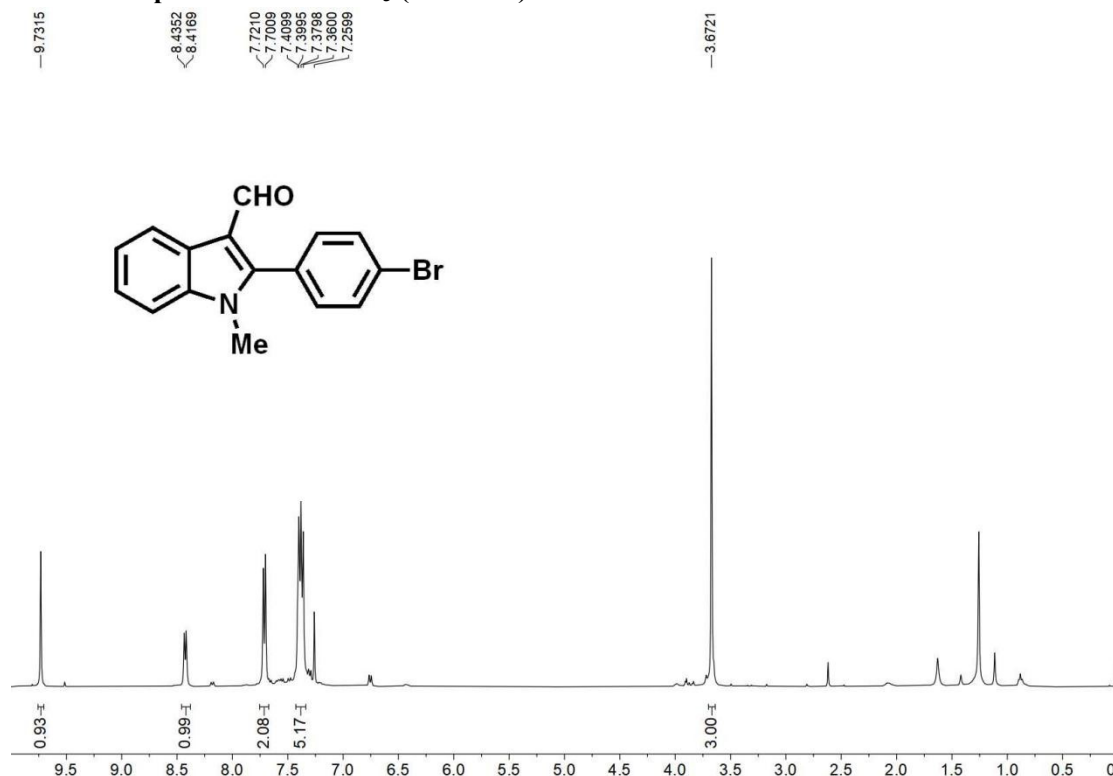

**<sup>13</sup>C NMR of product 3i in CDCl<sub>3</sub> (101 MHz)**

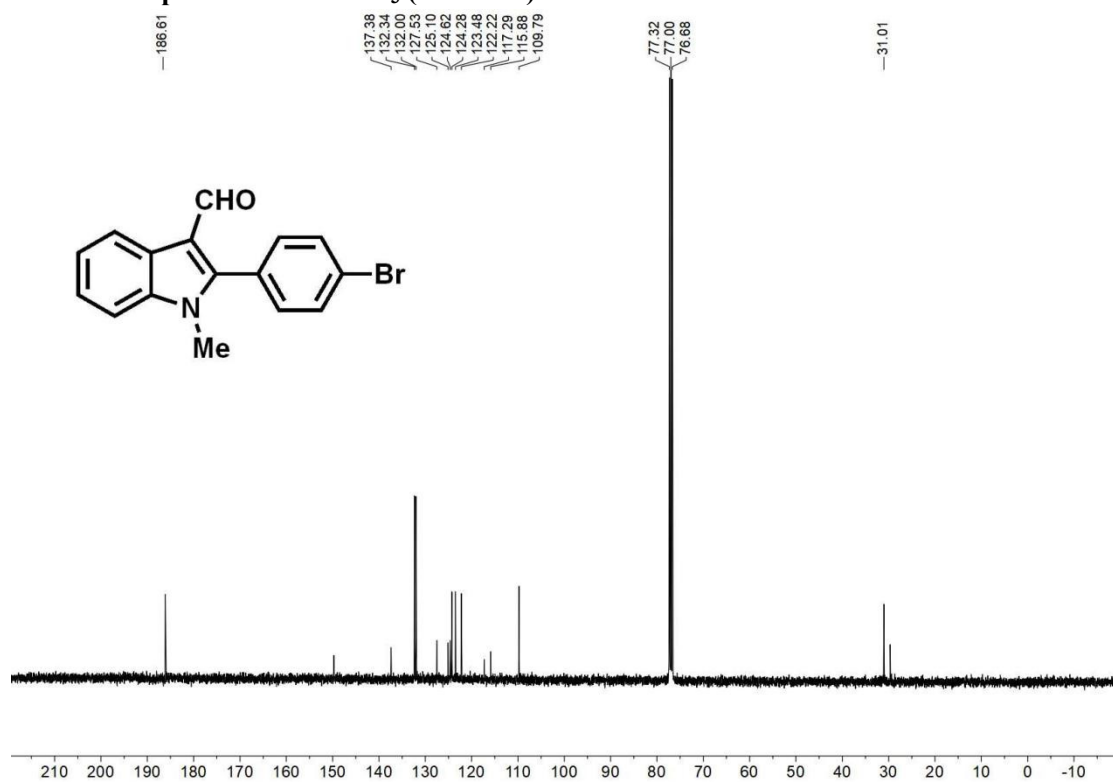

**<sup>1</sup>H NMR of product 3j in CDCl<sub>3</sub> (400 MHz)**

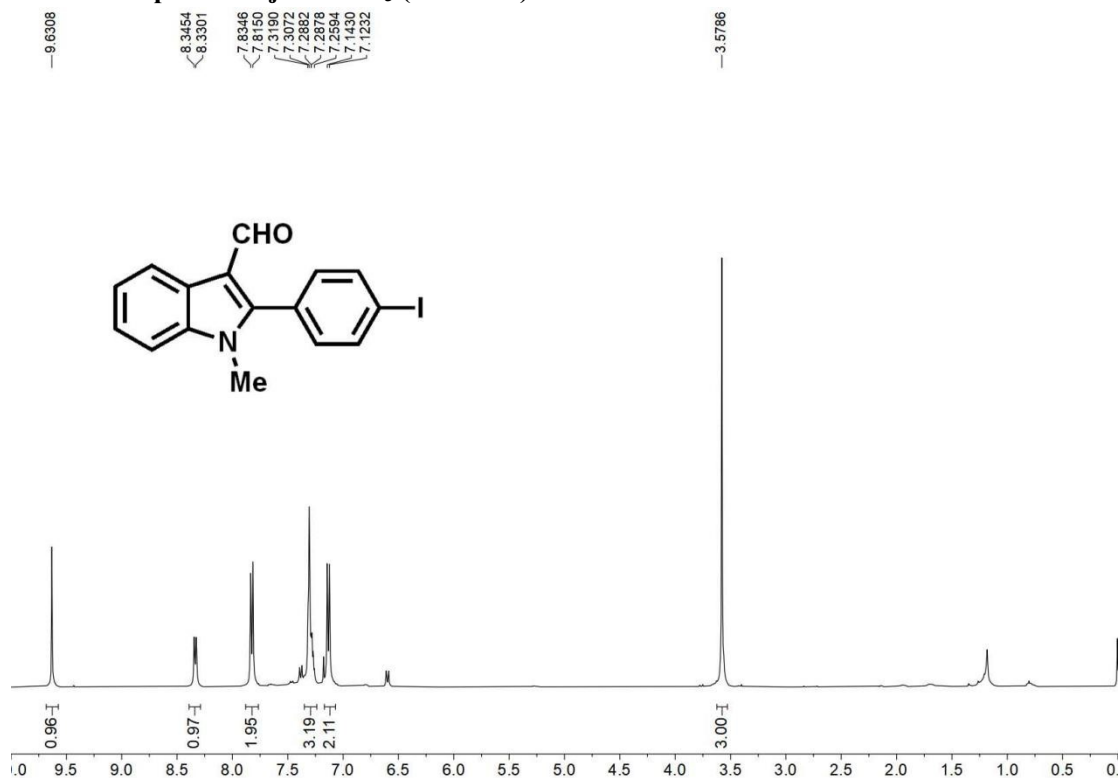

**<sup>13</sup>C NMR of product 3j in CDCl<sub>3</sub> (101 MHz)**

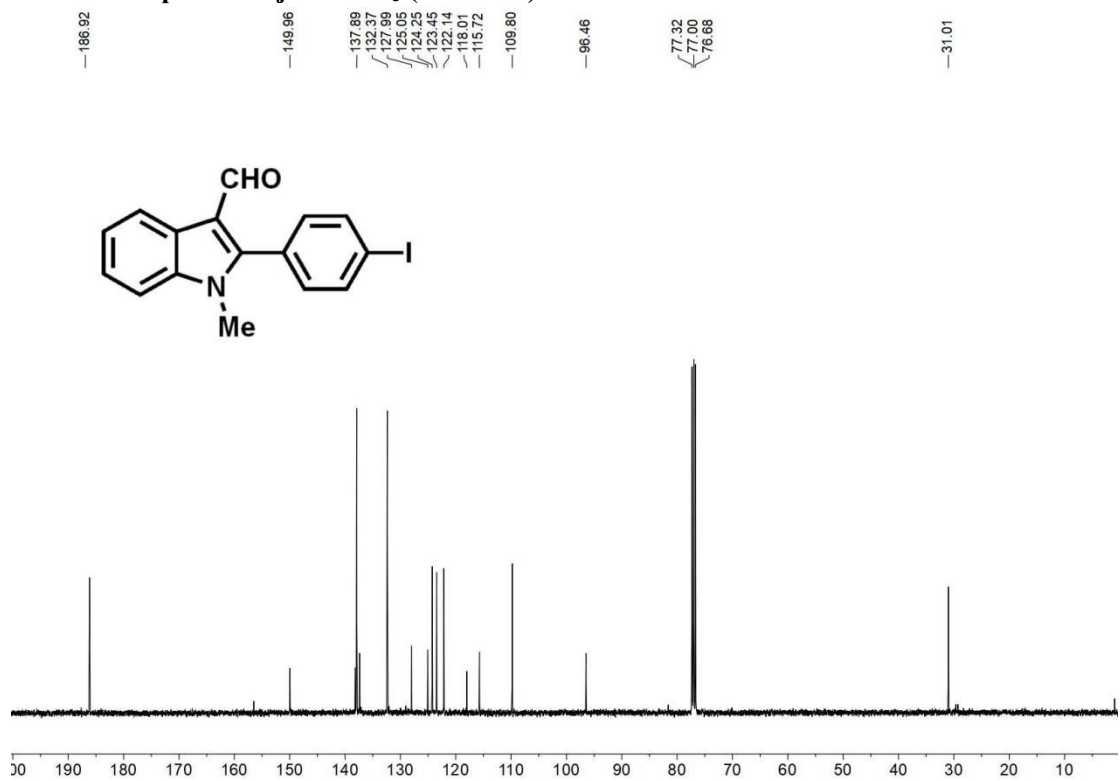



### <sup>1</sup>H NMR of product 3k in CDCl<sub>3</sub> (600 MHz)

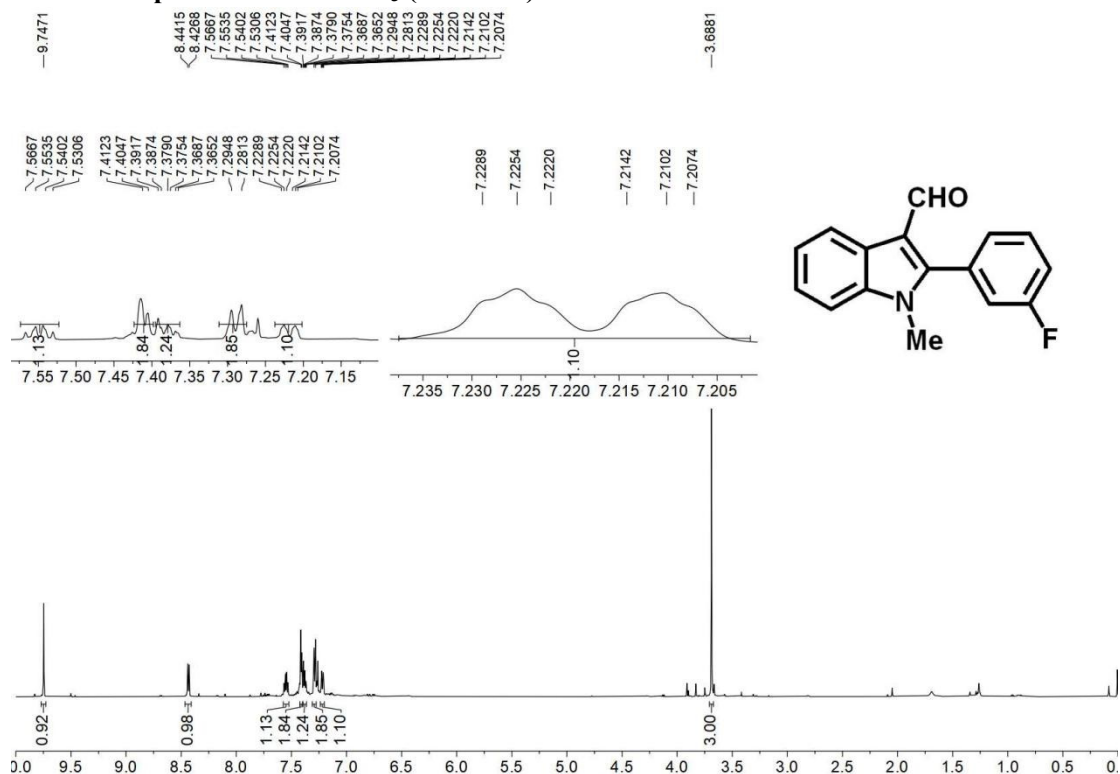

### <sup>13</sup>C NMR of product 3k in CDCl<sub>3</sub> (151 MHz)

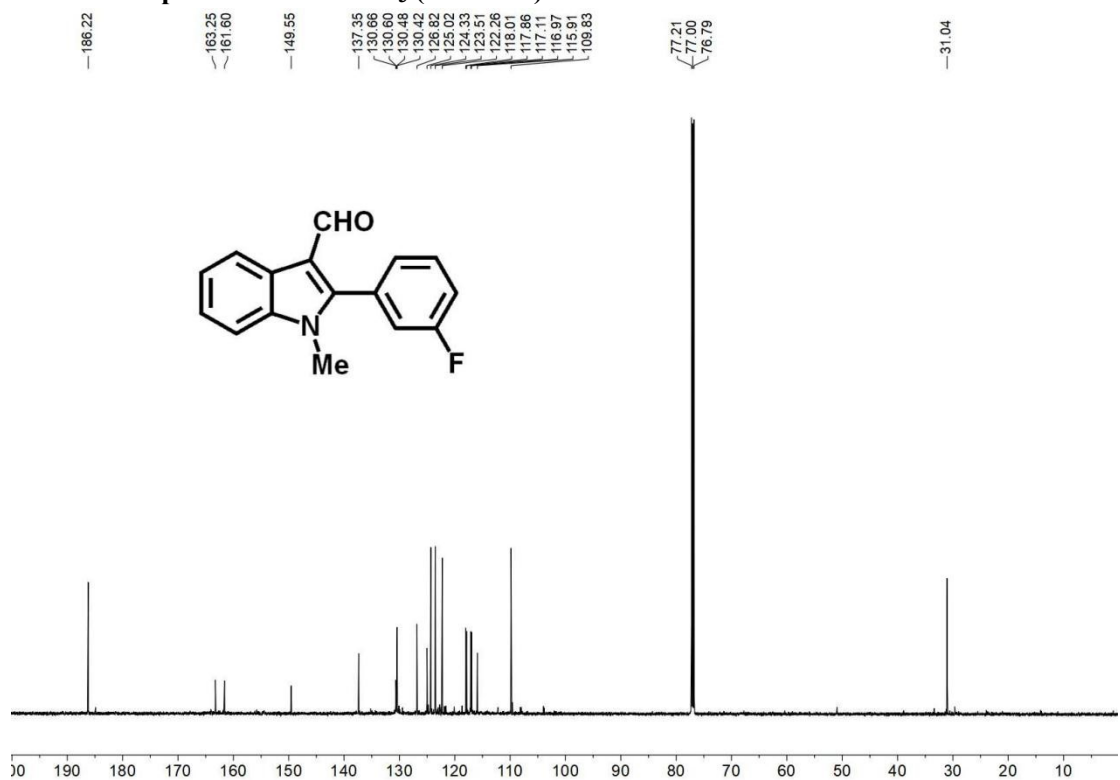

<sup>19</sup>F NMR of product 3k in CDCl<sub>3</sub> (565 MHz)

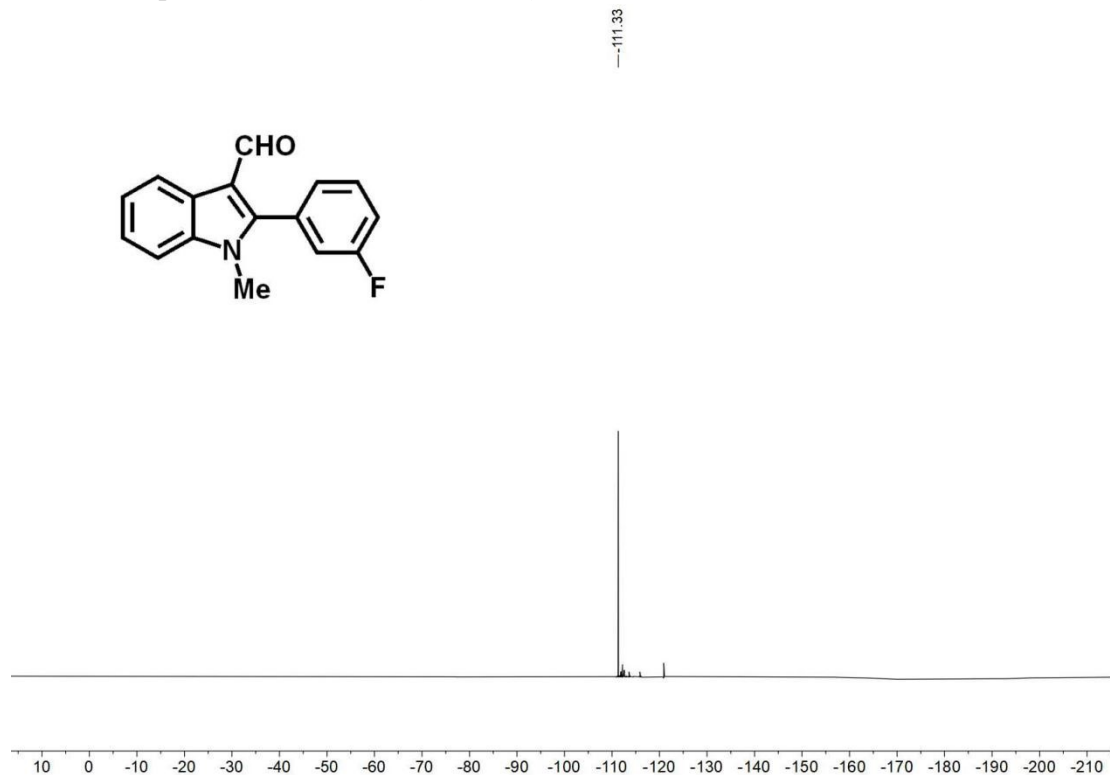

<sup>1</sup>H NMR of product 3l in CDCl<sub>3</sub> (600 MHz)

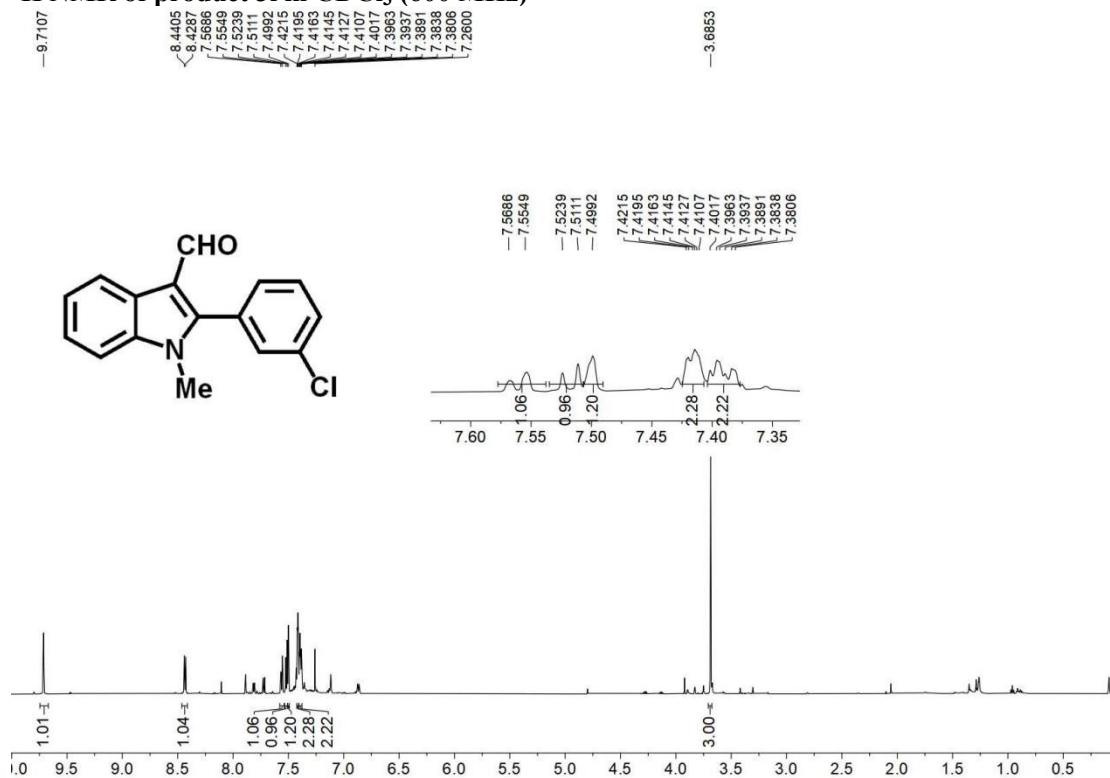

**<sup>13</sup>C NMR of product 3l in CDCl<sub>3</sub> (151 MHz)**

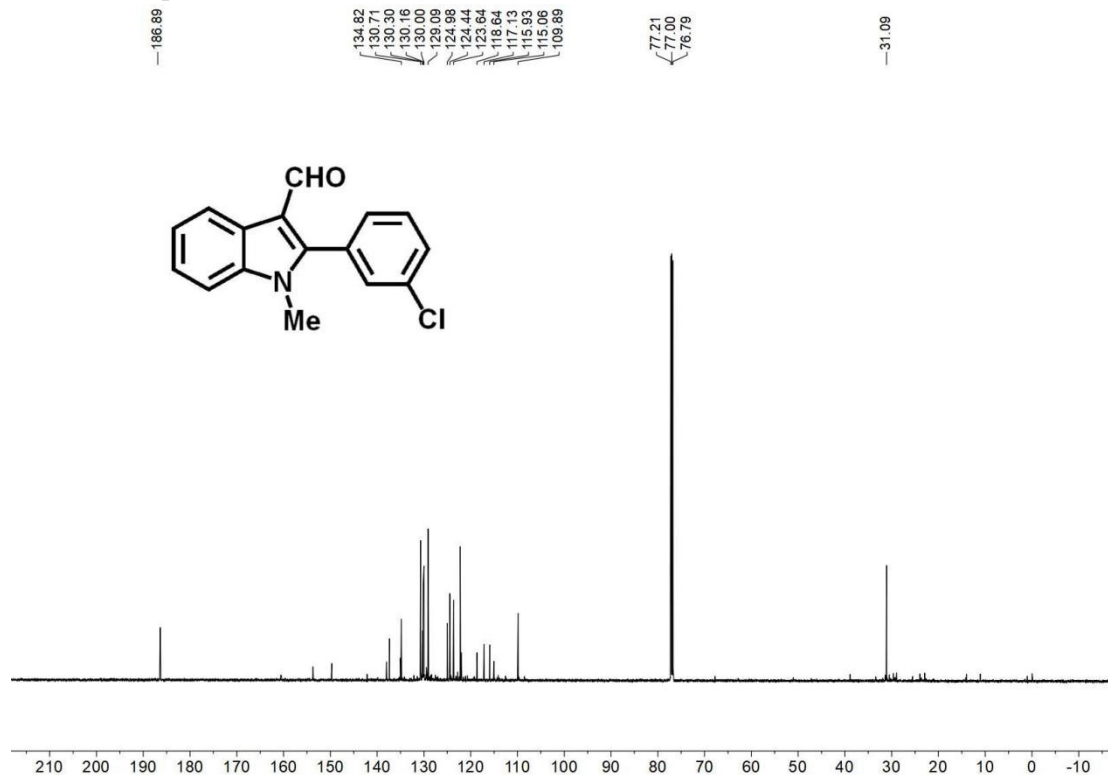

**<sup>1</sup>H NMR of product 3m in CDCl<sub>3</sub> (400 MHz)**

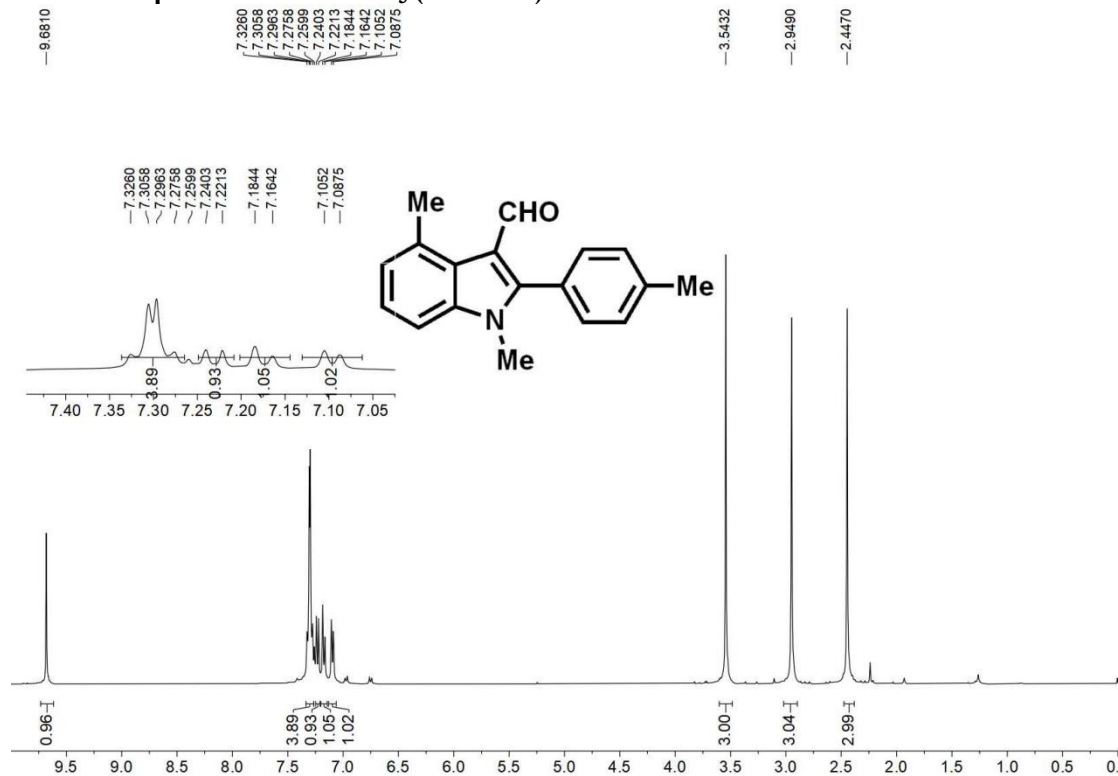

**<sup>13</sup>C NMR of product 3m in CDCl<sub>3</sub> (101 MHz)**

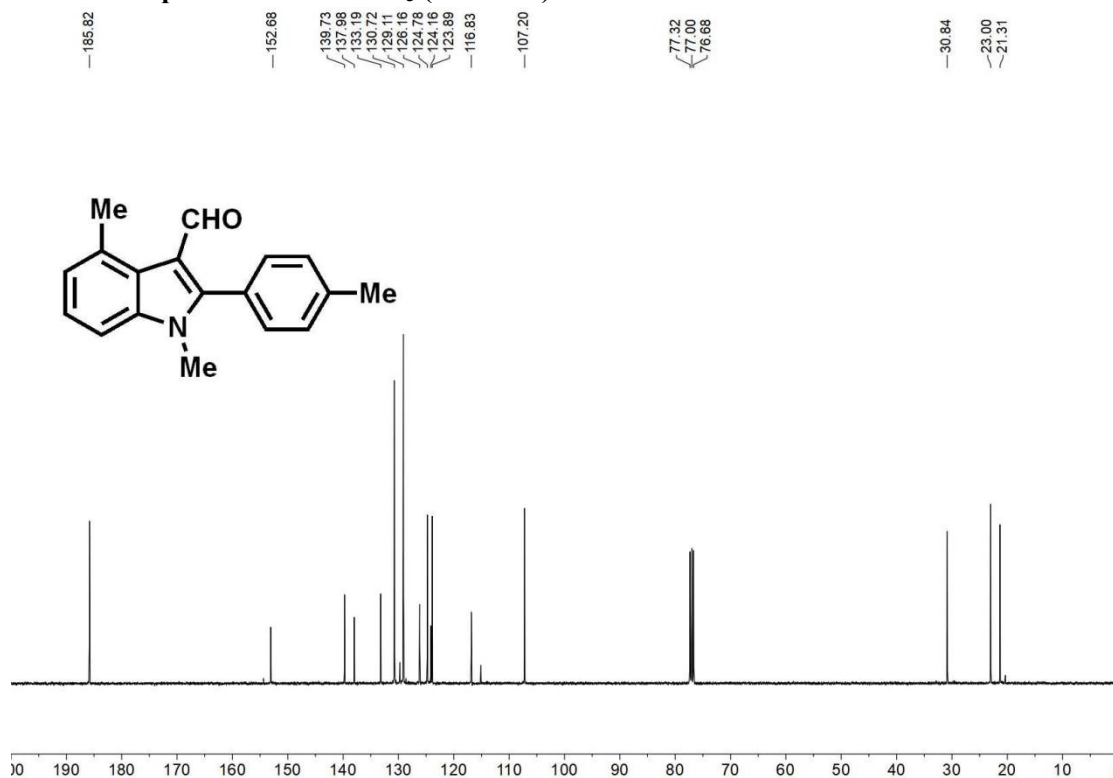

**<sup>1</sup>H NMR of product 3n in CDCl<sub>3</sub> (400 MHz)**

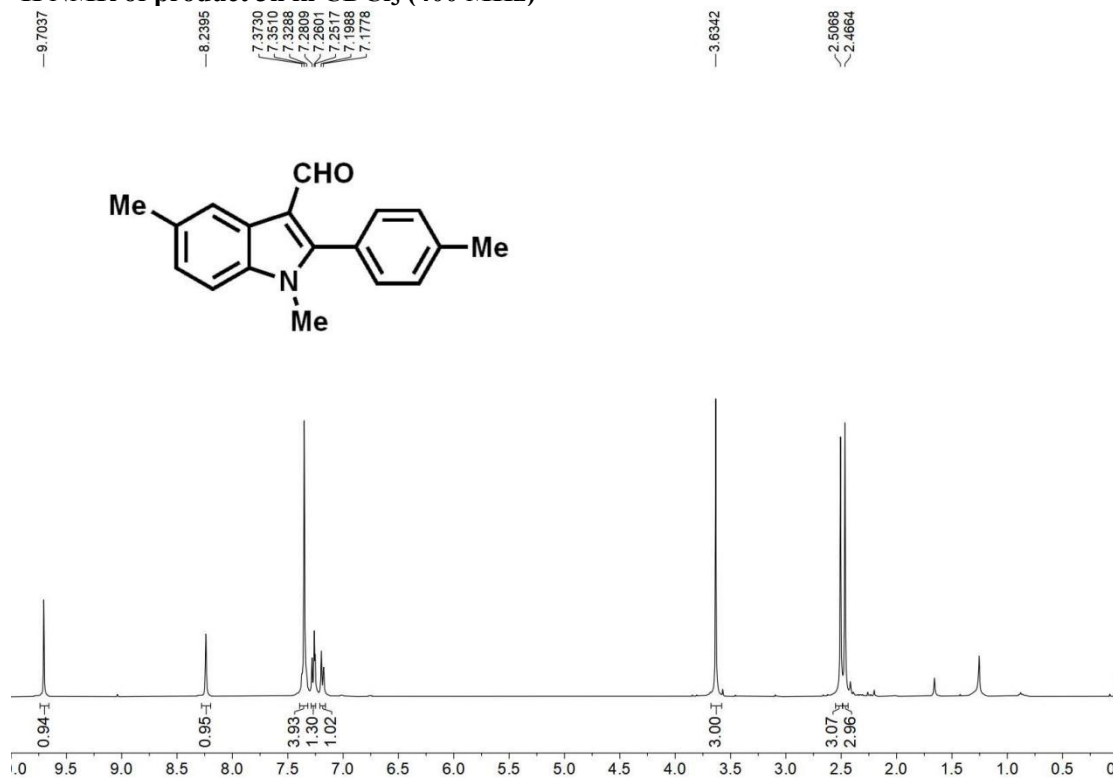

**$^{13}\text{C}$  NMR of product 3n in  $\text{CDCl}_3$  (101 MHz)**

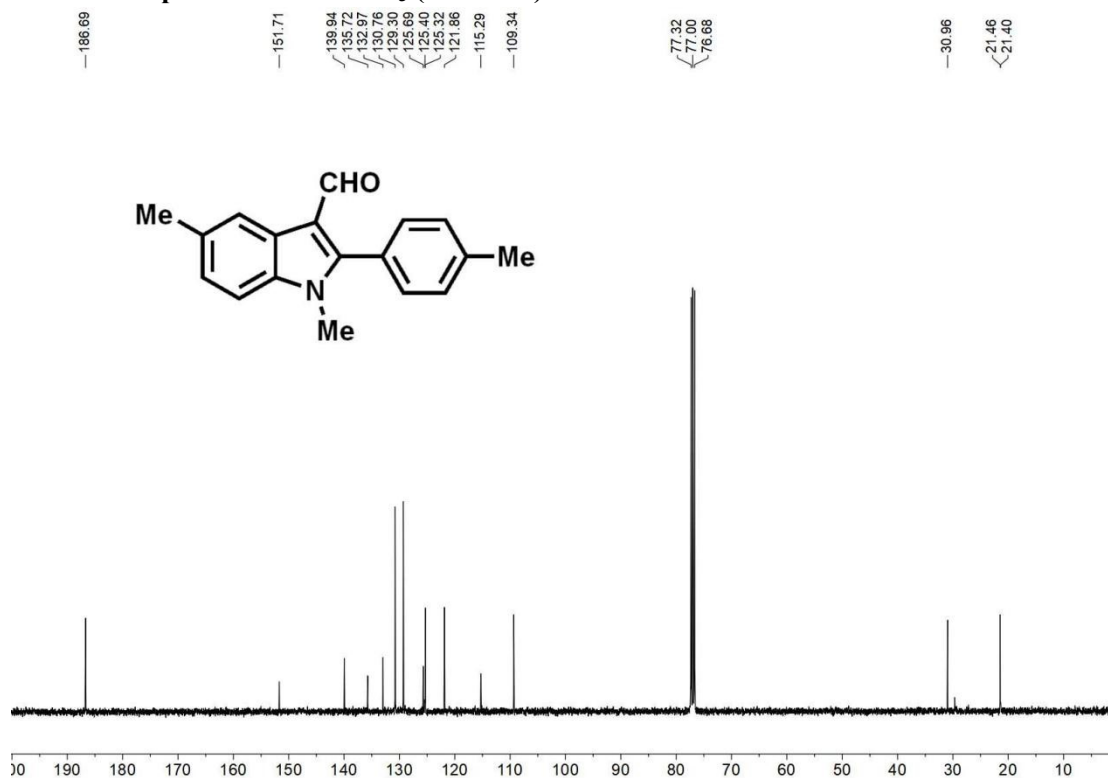

**$^1\text{H}$  NMR of product 3o in  $\text{CDCl}_3$  (400 MHz)**

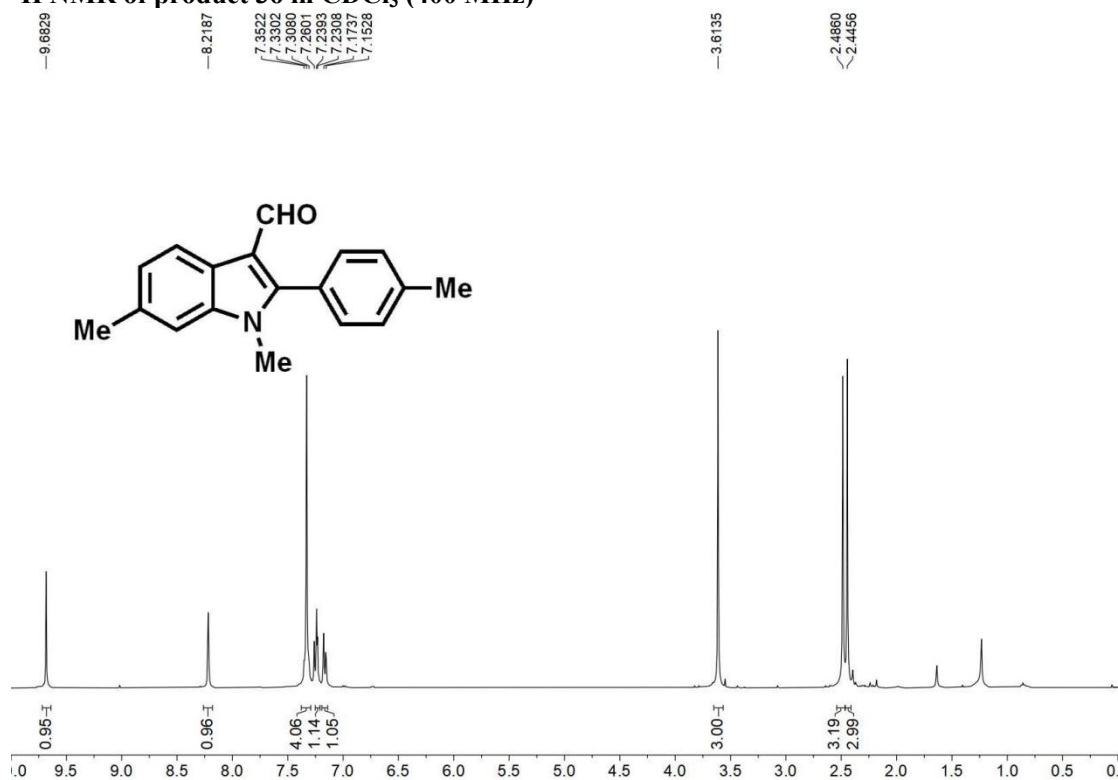

**$^{13}\text{C}$  NMR of product 3o in  $\text{CDCl}_3$  (101 MHz)**

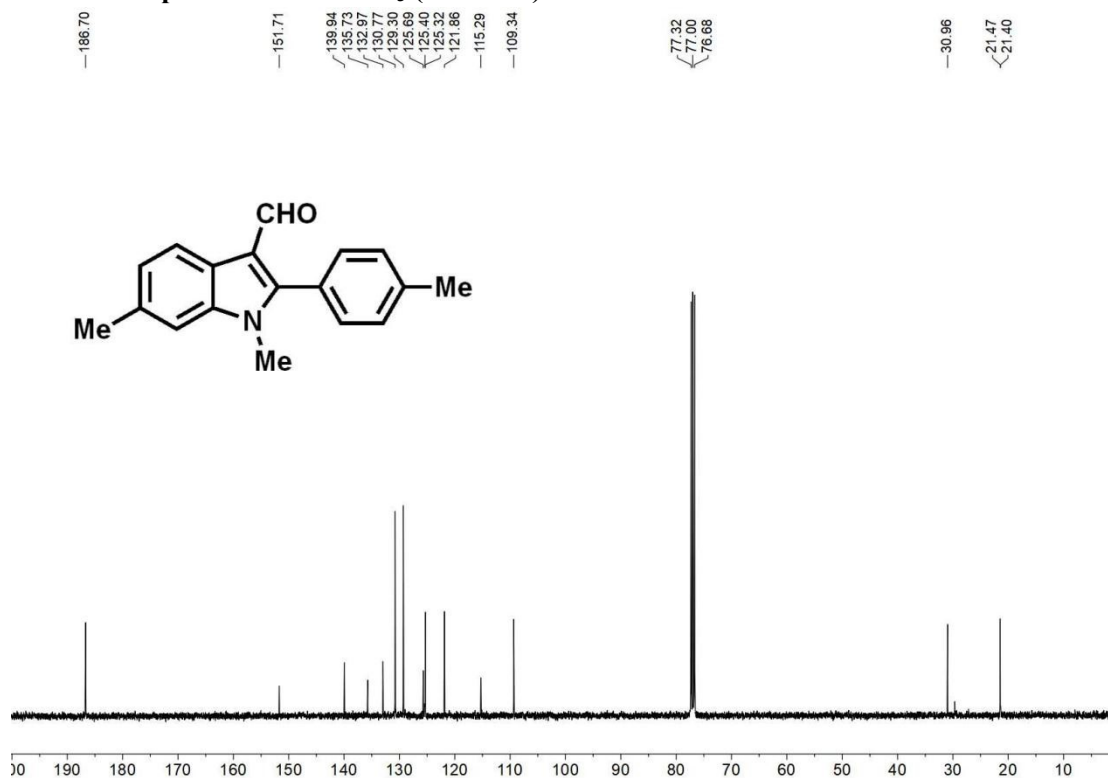

**$^1\text{H}$  NMR of product 3p in  $\text{CDCl}_3$  (400 MHz)**

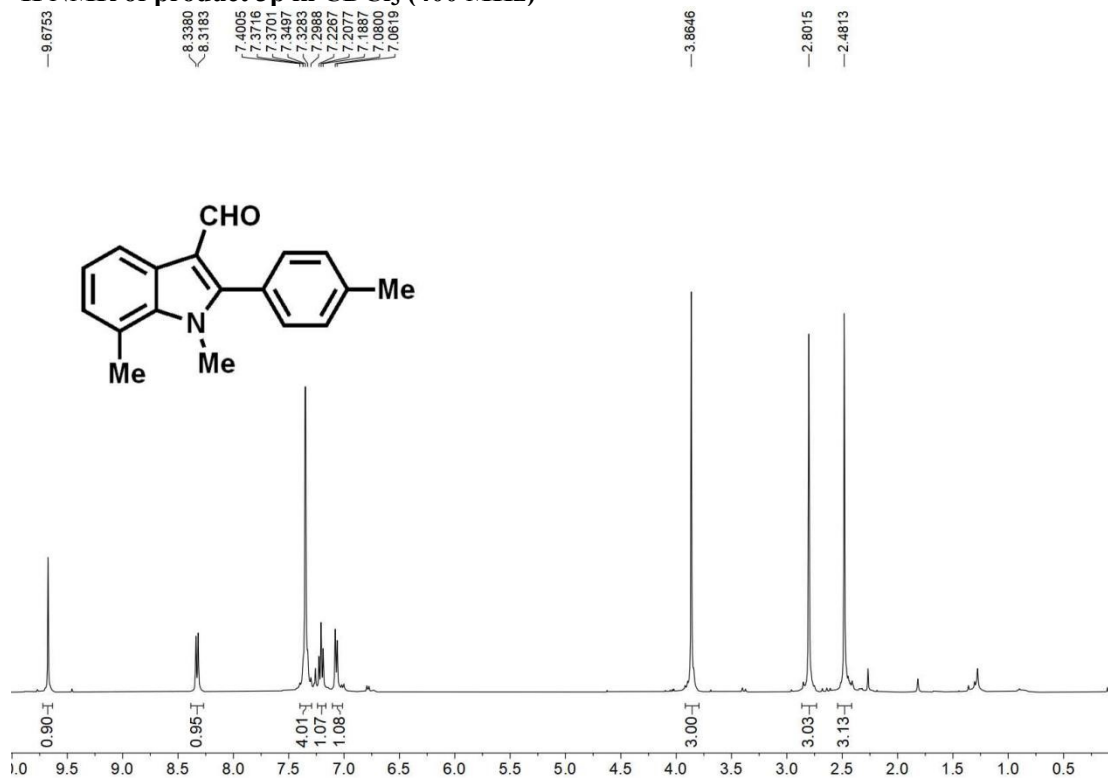

**<sup>13</sup>C NMR of product 3p in CDCl<sub>3</sub> (101 MHz)**

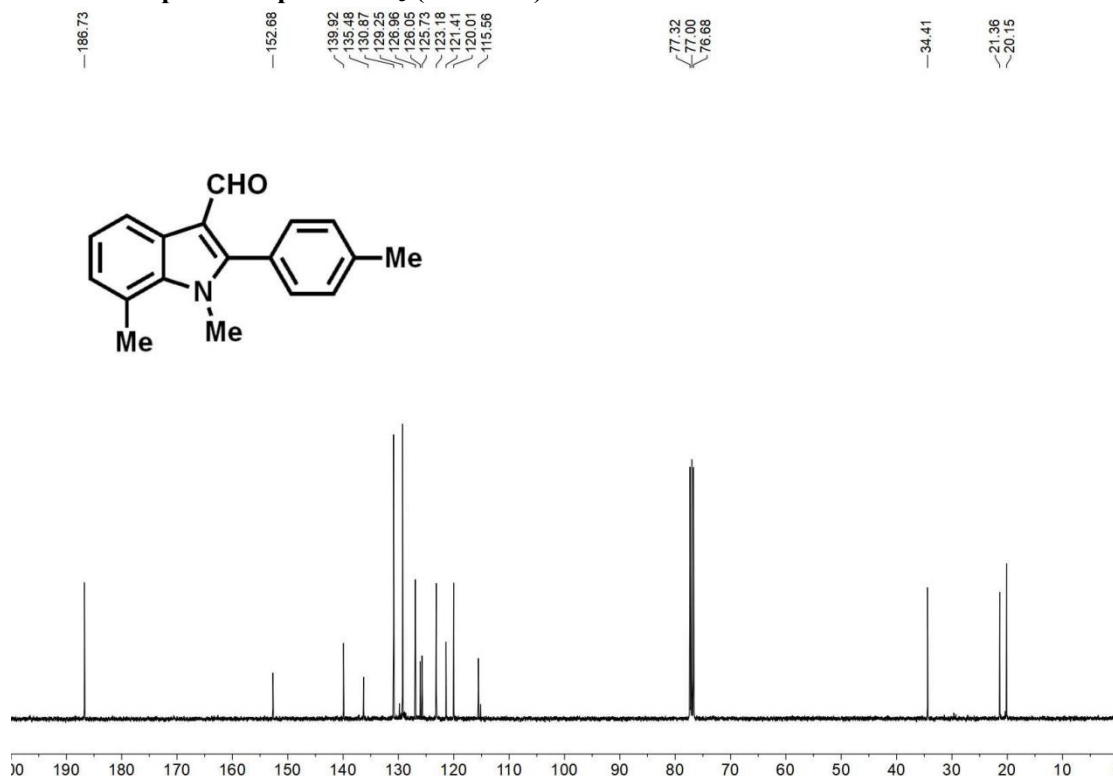

**<sup>1</sup>H NMR of product 3q in CDCl<sub>3</sub> (400 MHz)**

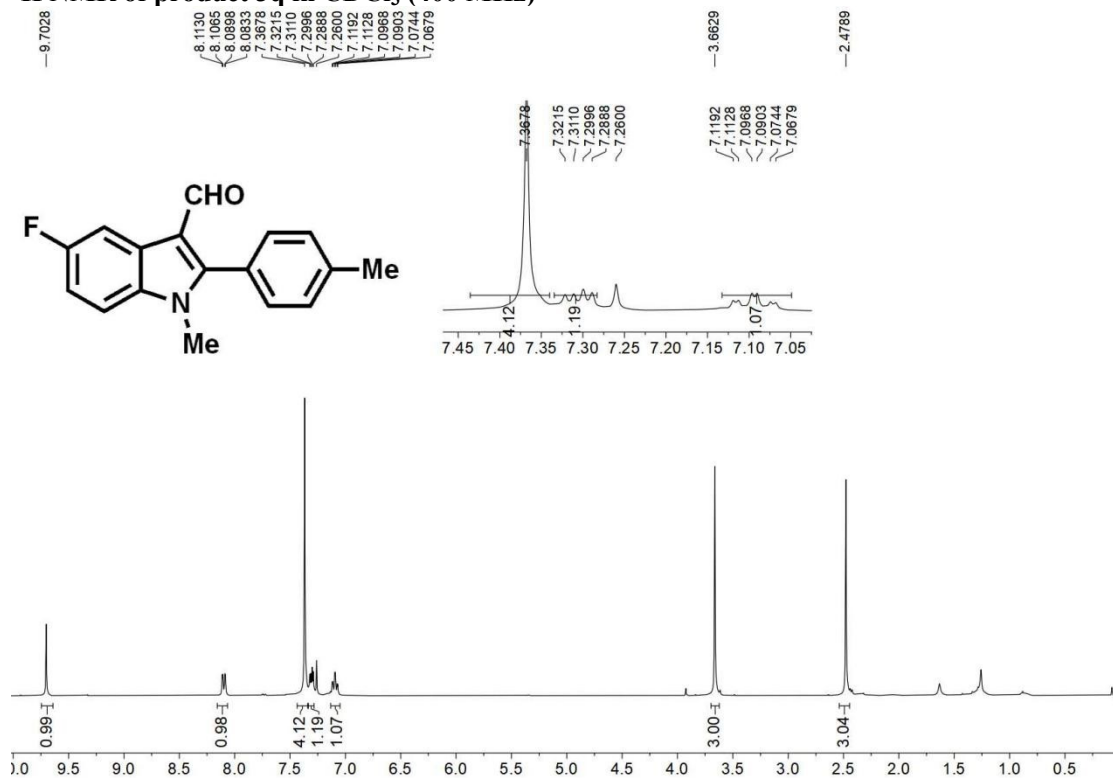

**$^{13}\text{C}$  NMR of product 3q in  $\text{CDCl}_3$  (101 MHz)**

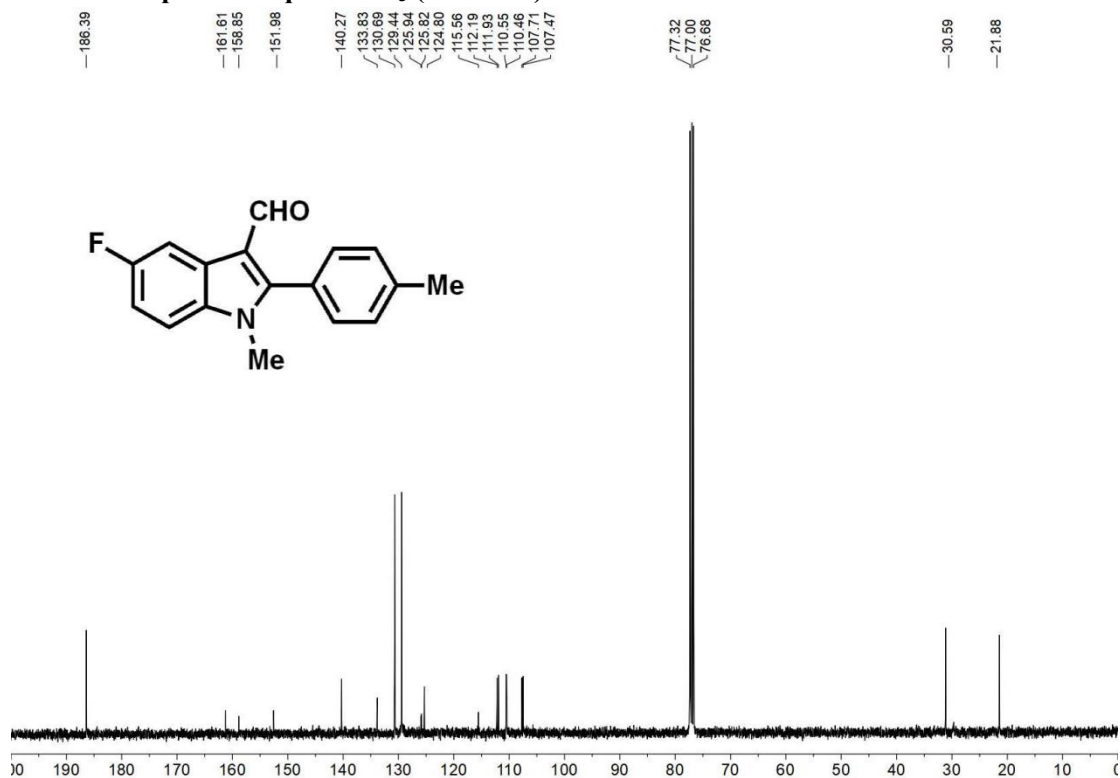

**$^{19}\text{F}$  NMR of product 3q in  $\text{CDCl}_3$  (565 MHz)**

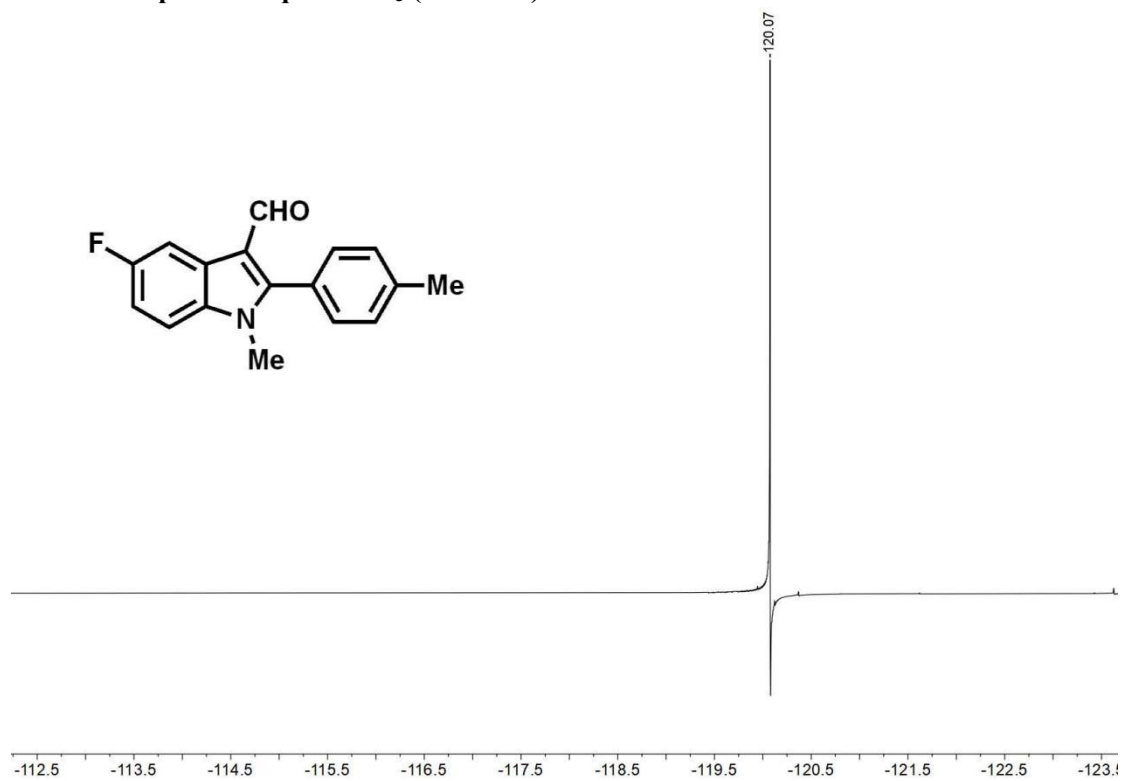



**<sup>1</sup>H NMR of product 3r in CDCl<sub>3</sub> (400 MHz)**

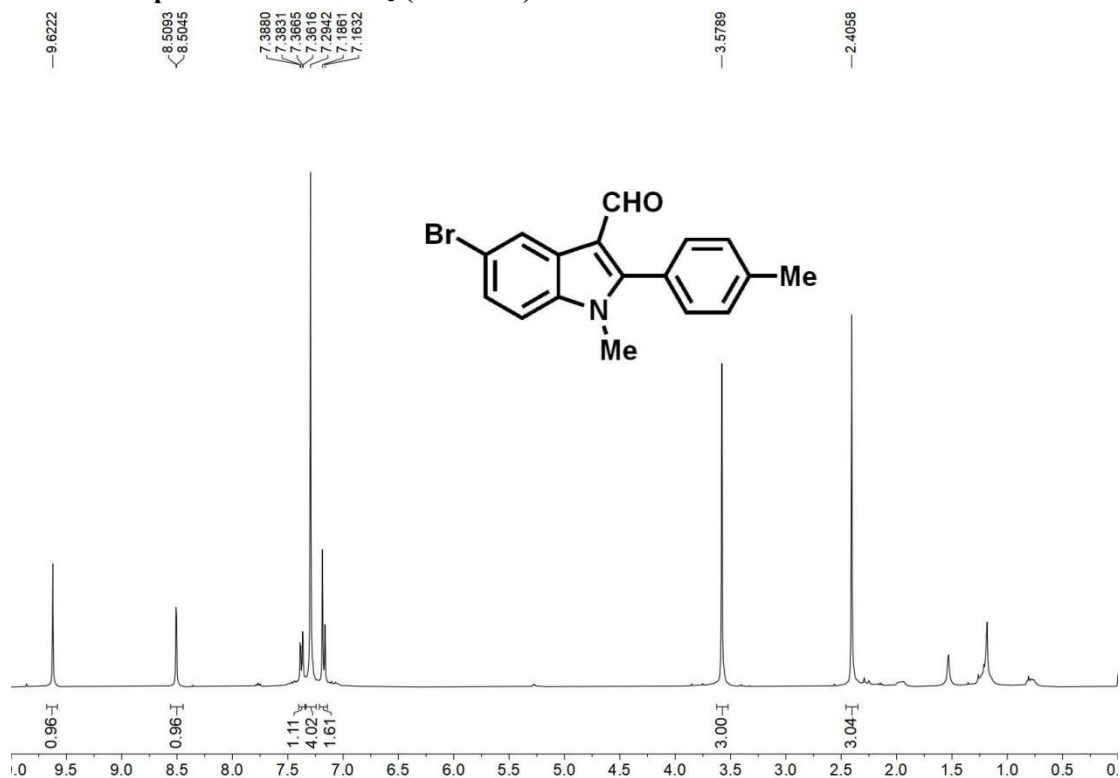

**<sup>13</sup>C NMR of product 3r in CDCl<sub>3</sub> (101 MHz)**

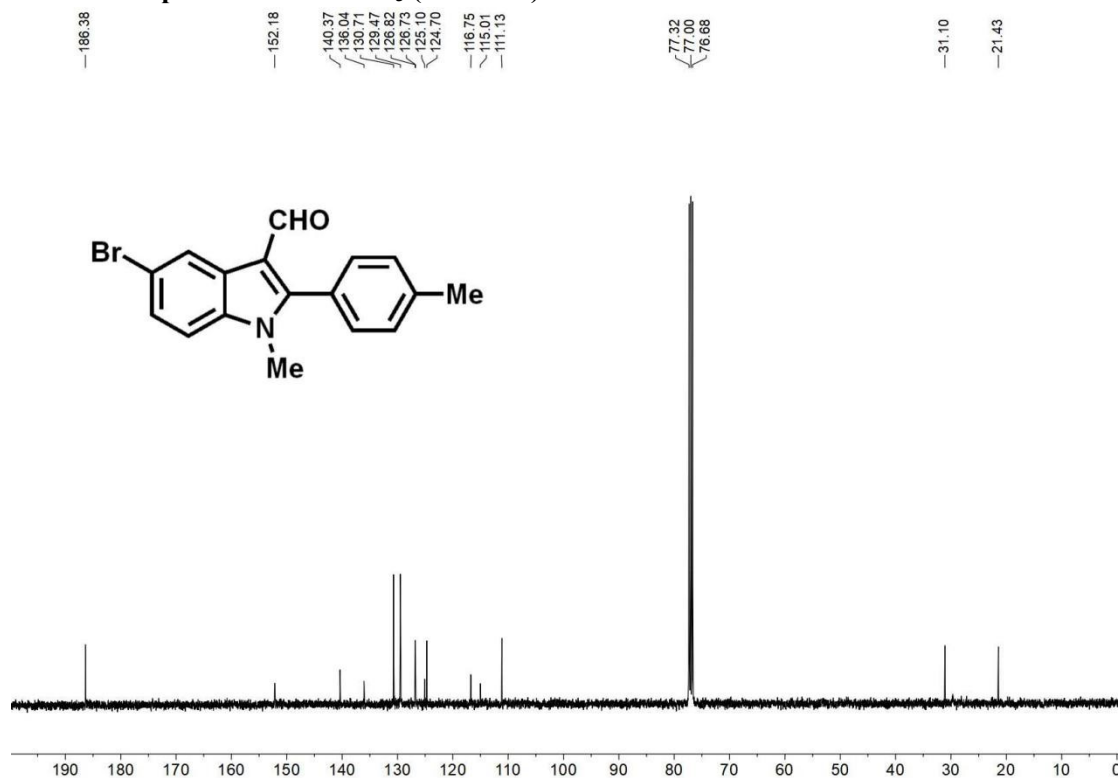

**<sup>1</sup>H NMR of product 3s in CDCl<sub>3</sub> (400 MHz)**

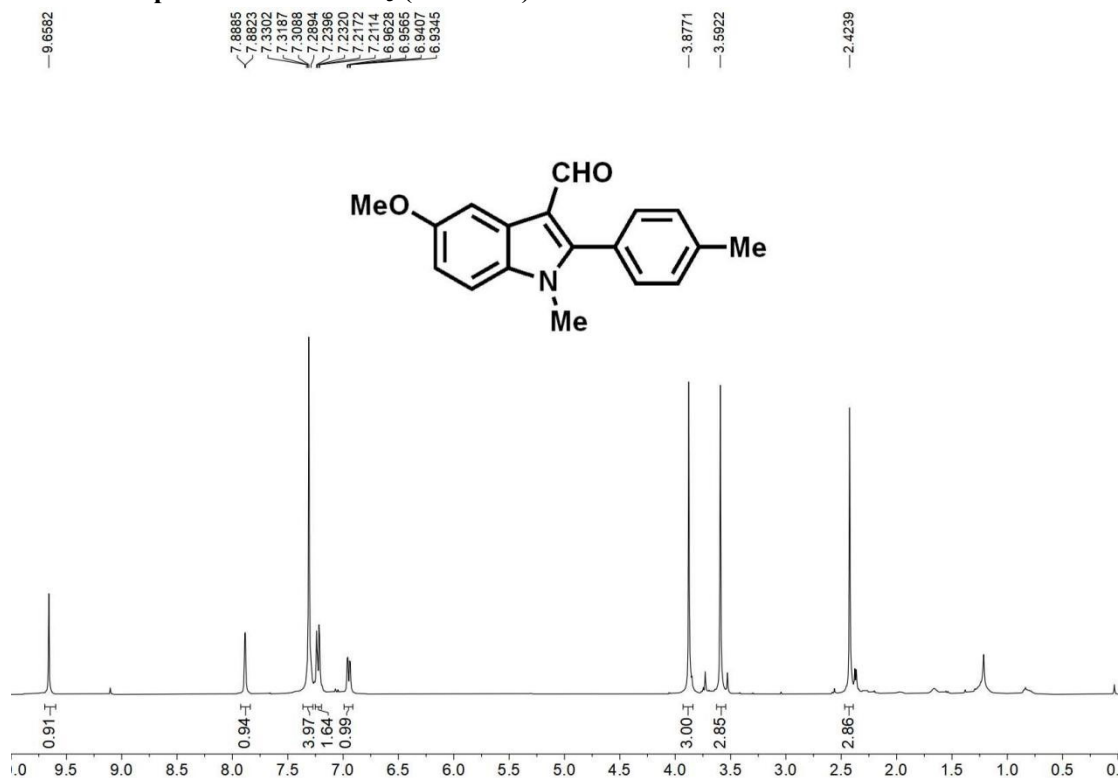

**<sup>13</sup>C NMR of product 3s in CDCl<sub>3</sub> (101 MHz)**

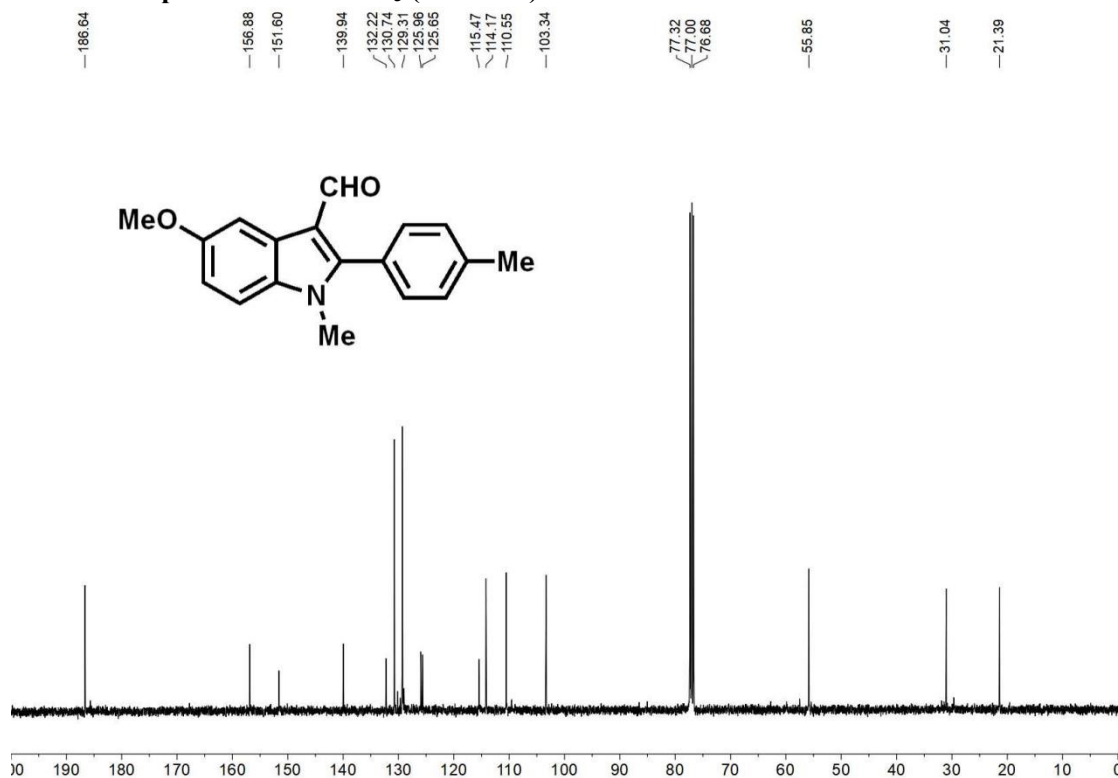

**<sup>1</sup>H NMR of product 3t in CDCl<sub>3</sub> (400 MHz)**

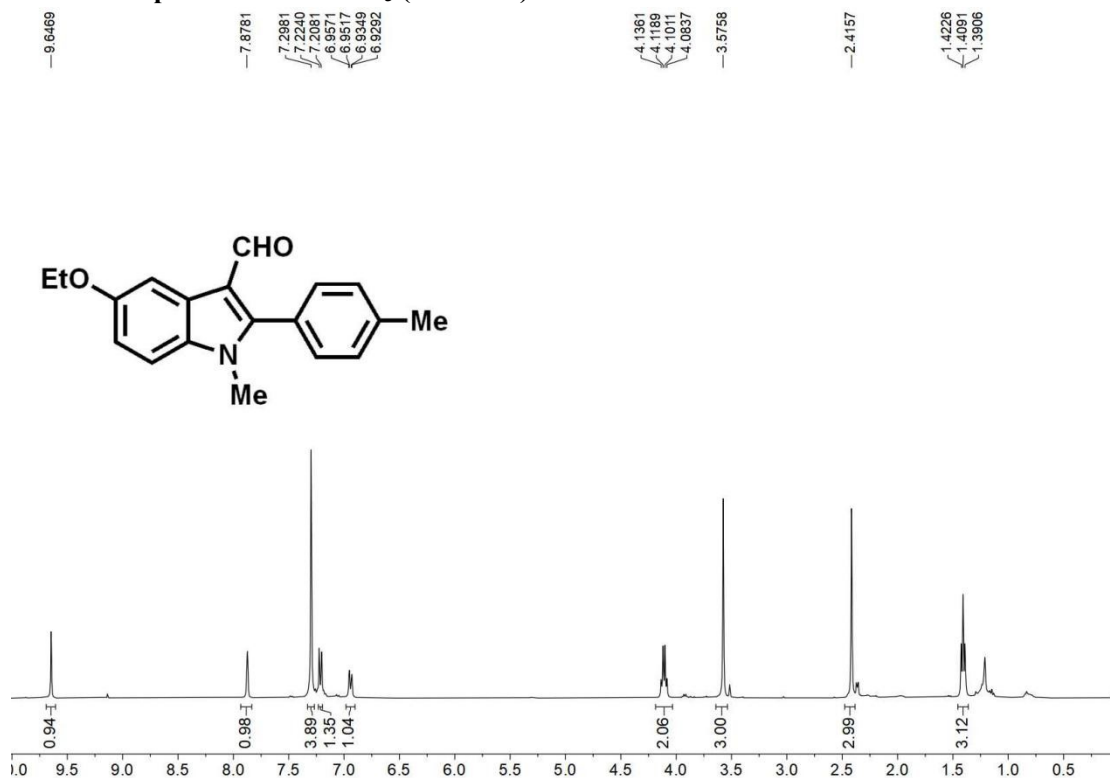

**<sup>13</sup>C NMR of product 3t in CDCl<sub>3</sub> (101 MHz)**

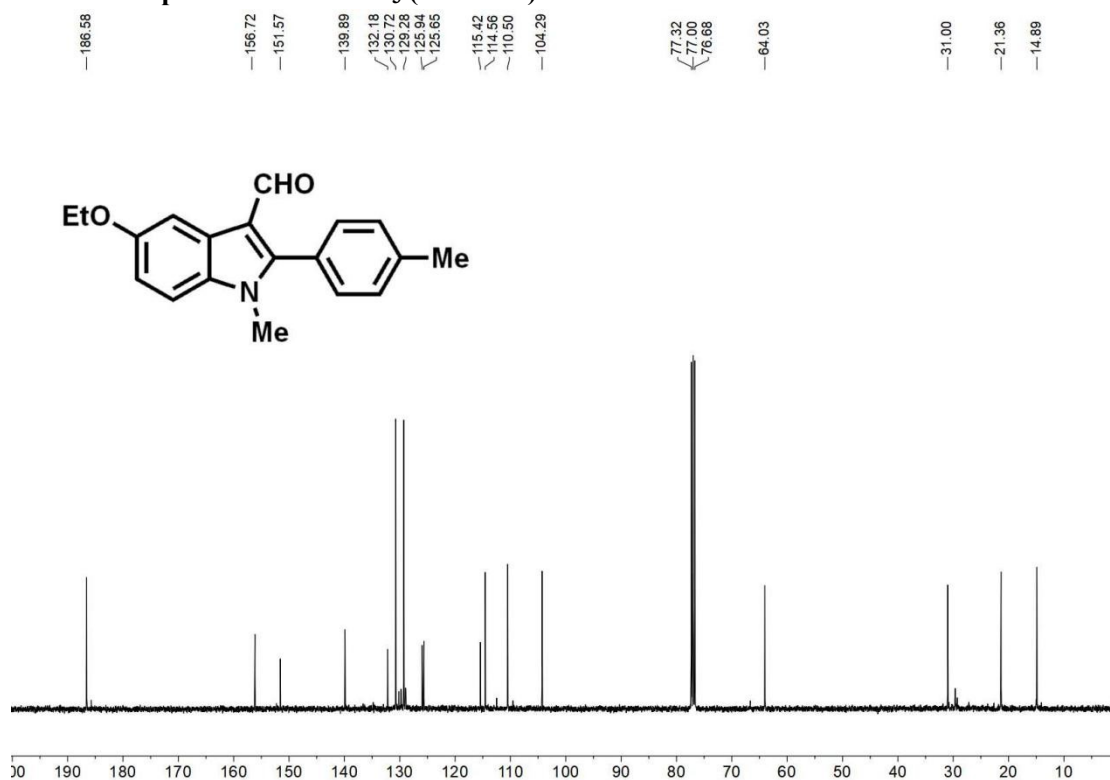

**<sup>1</sup>H NMR of product 3u in CDCl<sub>3</sub> (400 MHz)**

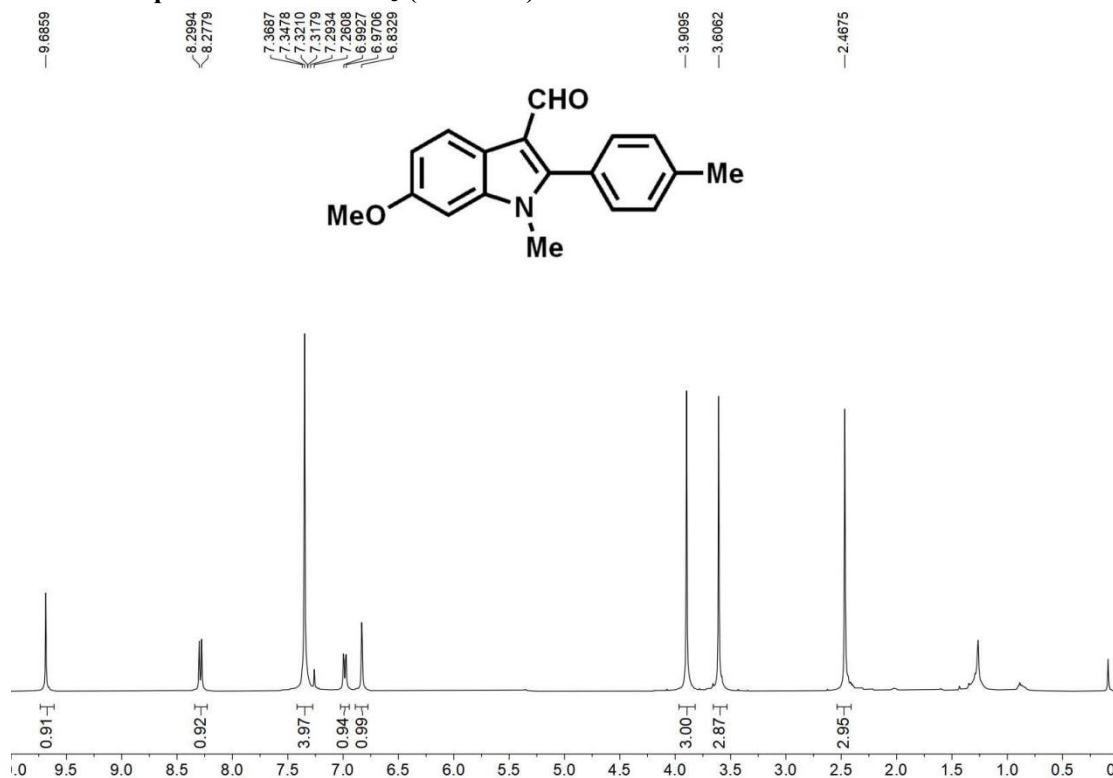

**<sup>13</sup>C NMR of product 3u in CDCl<sub>3</sub> (101 MHz)**

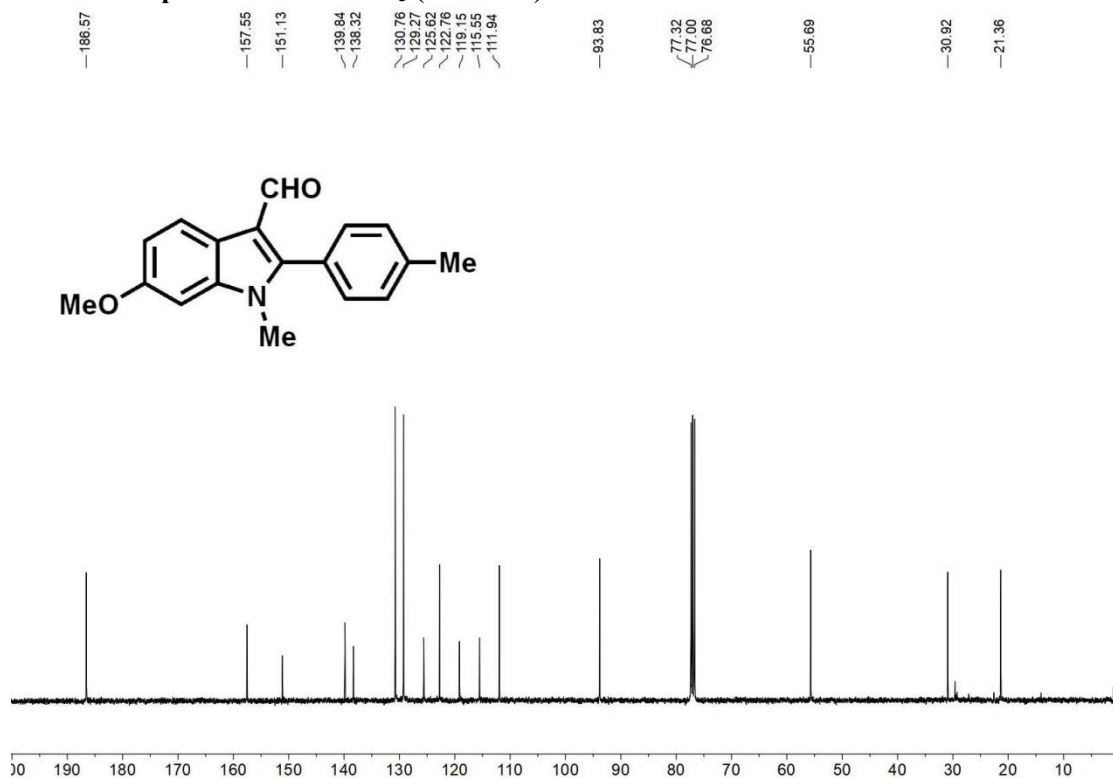

**<sup>1</sup>H NMR of product 3v in DMSO-*d*<sub>6</sub> (400 MHz)**

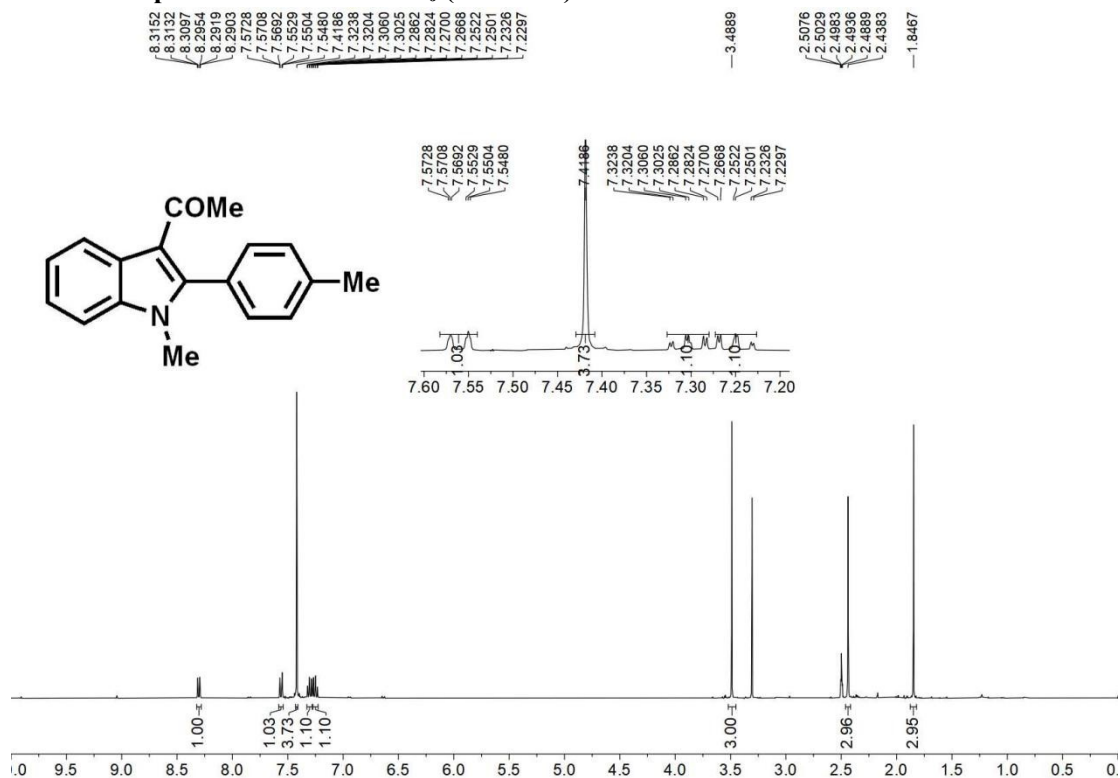

**<sup>13</sup>C NMR of product 3v in CDCl<sub>3</sub> (151 MHz)**

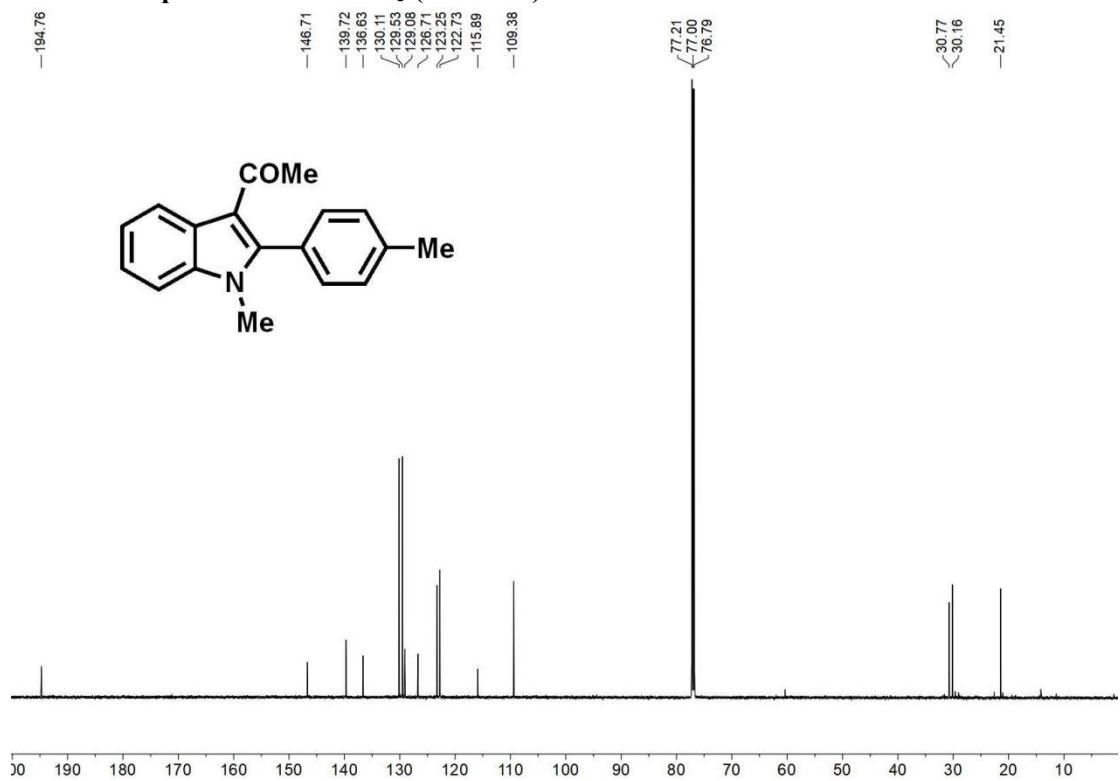

### <sup>1</sup>H NMR of product 3w in CDCl<sub>3</sub> (600 MHz)

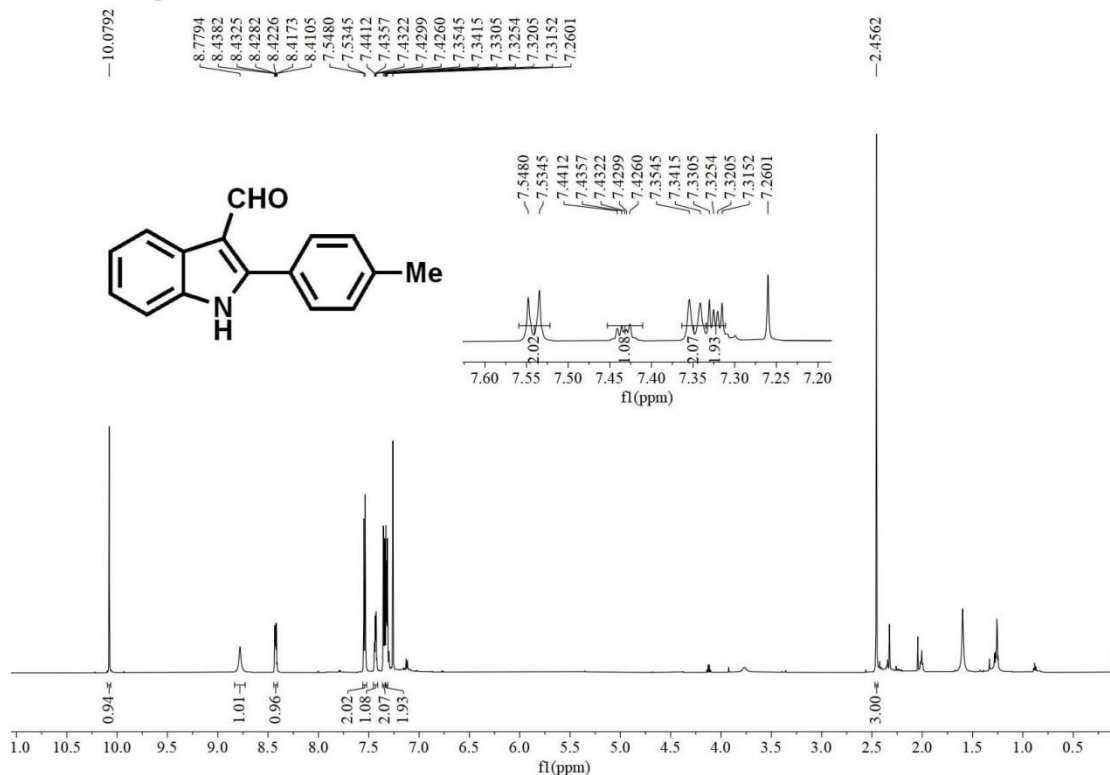

### <sup>13</sup>C NMR of product 3w in CDCl<sub>3</sub> (151 MHz)

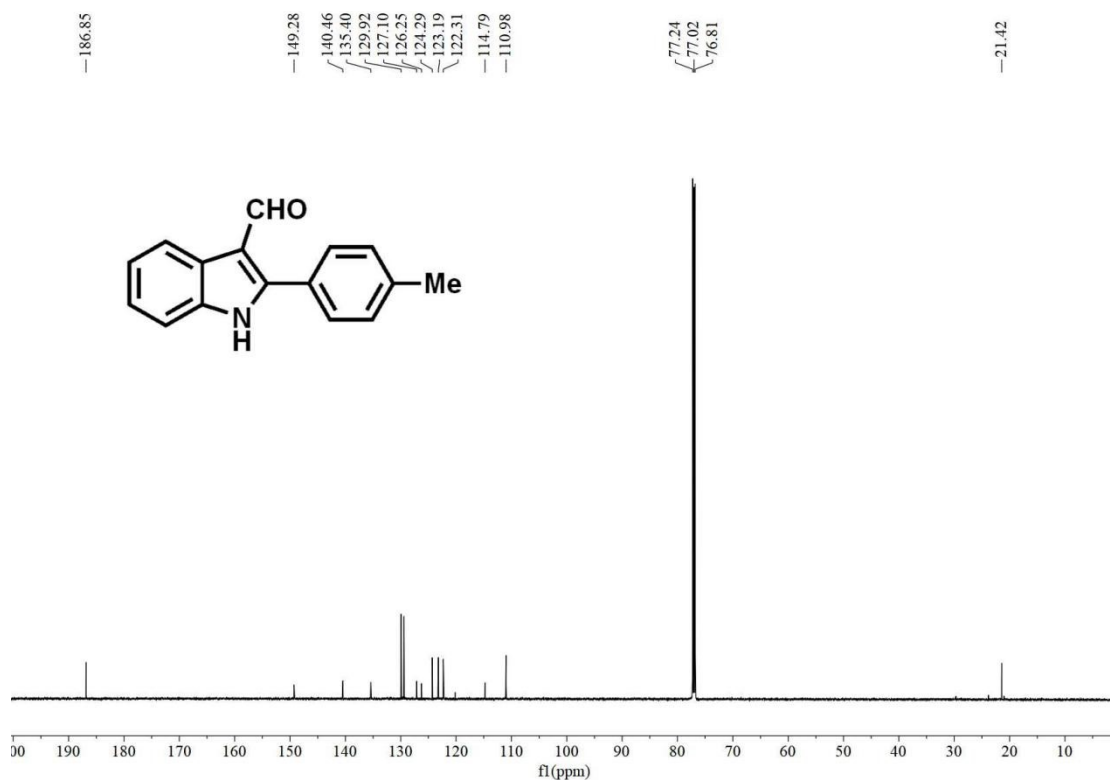

Supplement: d3qo01002c1.pdf [file d3qo01002c1.pdf]
